# Supplementary material
Source: publisher site journal article supplement (https://www.spandidos-publications.com/2812/downloadSupplementary)
Supplement: Supplementary file 1 [file downloadSupplementary]

## Sheet: Supplement 1 (8)
Table SI. CSV files containing CHEK2 variants after analysis with the GEnome MINIng v0.18.3 software. CHEK2, checkpoint kinase 2.
SAMPLE_ID	gt_depth	gt_ref_depth	gt_alt_depth	gt	gt_qual	variant_id	chrom	start	end	ref	type	sub_type	aaf	num_hom_ref	num_het	num_hom_alt	num_unknown	hwe	gene	exon	transcript	codon_change	aa_change	aa_length	pfam_domain	biotype	impact_so	impact_severity	in_dbsnp	rs_ids	in_esp	aaf_esp_ea	aaf_esp_all	in_1kg	aaf_1kg_eur	aaf_1kg_all	in_exac	aaf_exac_all	aaf_adj_exac_all	aaf_adj_exac_nfe	in_omim	rmsk	in_cpg_island	in_segdup	cadd_raw	cadd_scaled	fitcons	clinvar_sig	clinvar_disease_name
1.ATR2U	207	205	2	C/C	99.0	793	chr22	29083904	29083905	C	snp	tv	0.00757575757576	65	1	0	0	0.950550440504	CHEK2	16	ENST00000382580	Gtg/Ttg	p.Val581Leu/c.1741G>T	586	None	protein_coding	missense_variant	MED	0	None	0	-1.0	-1.0	0	-1.0	-1.0	0	-1.0	-1.0	-1.0	0	None	0	1	1.88	12.25	0.732398	None	None
10.ATU14	118	118	0	C/C	99.0	793	chr22	29083904	29083905	C	snp	tv	0.00757575757576	65	1	0	0	0.950550440504	CHEK2	16	ENST00000382580	Gtg/Ttg	p.Val581Leu/c.1741G>T	586	None	protein_coding	missense_variant	MED	0	None	0	-1.0	-1.0	0	-1.0	-1.0	0	-1.0	-1.0	-1.0	0	None	0	1	1.88	12.25	0.732398	None	None
17.AUMV1	142	142	0	C/C	99.0	793	chr22	29083904	29083905	C	snp	tv	0.00757575757576	65	1	0	0	0.950550440504	CHEK2	16	ENST00000382580	Gtg/Ttg	p.Val581Leu/c.1741G>T	586	None	protein_coding	missense_variant	MED	0	None	0	-1.0	-1.0	0	-1.0	-1.0	0	-1.0	-1.0	-1.0	0	None	0	1	1.88	12.25	0.732398	None	None
2.ATR2U	293	293	0	C/C	99.0	793	chr22	29083904	29083905	C	snp	tv	0.00757575757576	65	1	0	0	0.950550440504	CHEK2	16	ENST00000382580	Gtg/Ttg	p.Val581Leu/c.1741G>T	586	None	protein_coding	missense_variant	MED	0	None	0	-1.0	-1.0	0	-1.0	-1.0	0	-1.0	-1.0	-1.0	0	None	0	1	1.88	12.25	0.732398	None	None
21.AL9E5	111	111	0	C/C	99.0	793	chr22	29083904	29083905	C	snp	tv	0.00757575757576	65	1	0	0	0.950550440504	CHEK2	16	ENST00000382580	Gtg/Ttg	p.Val581Leu/c.1741G>T	586	None	protein_coding	missense_variant	MED	0	None	0	-1.0	-1.0	0	-1.0	-1.0	0	-1.0	-1.0	-1.0	0	None	0	1	1.88	12.25	0.732398	None	None
22.AUMV1	182	182	0	C/C	99.0	793	chr22	29083904	29083905	C	snp	tv	0.00757575757576	65	1	0	0	0.950550440504	CHEK2	16	ENST00000382580	Gtg/Ttg	p.Val581Leu/c.1741G>T	586	None	protein_coding	missense_variant	MED	0	None	0	-1.0	-1.0	0	-1.0	-1.0	0	-1.0	-1.0	-1.0	0	None	0	1	1.88	12.25	0.732398	None	None
26.ATU14	173	172	1	C/C	99.0	793	chr22	29083904	29083905	C	snp	tv	0.00757575757576	65	1	0	0	0.950550440504	CHEK2	16	ENST00000382580	Gtg/Ttg	p.Val581Leu/c.1741G>T	586	None	protein_coding	missense_variant	MED	0	None	0	-1.0	-1.0	0	-1.0	-1.0	0	-1.0	-1.0	-1.0	0	None	0	1	1.88	12.25	0.732398	None	None
31.ATU14	241	240	1	C/C	99.0	793	chr22	29083904	29083905	C	snp	tv	0.00757575757576	65	1	0	0	0.950550440504	CHEK2	16	ENST00000382580	Gtg/Ttg	p.Val581Leu/c.1741G>T	586	None	protein_coding	missense_variant	MED	0	None	0	-1.0	-1.0	0	-1.0	-1.0	0	-1.0	-1.0	-1.0	0	None	0	1	1.88	12.25	0.732398	None	None
35.ATU14	60	60	0	C/C	99.0	793	chr22	29083904	29083905	C	snp	tv	0.00757575757576	65	1	0	0	0.950550440504	CHEK2	16	ENST00000382580	Gtg/Ttg	p.Val581Leu/c.1741G>T	586	None	protein_coding	missense_variant	MED	0	None	0	-1.0	-1.0	0	-1.0	-1.0	0	-1.0	-1.0	-1.0	0	None	0	1	1.88	12.25	0.732398	None	None
37.ATU14	63	63	0	C/C	99.0	793	chr22	29083904	29083905	C	snp	tv	0.00757575757576	65	1	0	0	0.950550440504	CHEK2	16	ENST00000382580	Gtg/Ttg	p.Val581Leu/c.1741G>T	586	None	protein_coding	missense_variant	MED	0	None	0	-1.0	-1.0	0	-1.0	-1.0	0	-1.0	-1.0	-1.0	0	None	0	1	1.88	12.25	0.732398	None	None
45.ATU14	103	103	0	C/C	99.0	793	chr22	29083904	29083905	C	snp	tv	0.00757575757576	65	1	0	0	0.950550440504	CHEK2	16	ENST00000382580	Gtg/Ttg	p.Val581Leu/c.1741G>T	586	None	protein_coding	missense_variant	MED	0	None	0	-1.0	-1.0	0	-1.0	-1.0	0	-1.0	-1.0	-1.0	0	None	0	1	1.88	12.25	0.732398	None	None
5.ATR2U	406	405	1	C/C	99.0	793	chr22	29083904	29083905	C	snp	tv	0.00757575757576	65	1	0	0	0.950550440504	CHEK2	16	ENST00000382580	Gtg/Ttg	p.Val581Leu/c.1741G>T	586	None	protein_coding	missense_variant	MED	0	None	0	-1.0	-1.0	0	-1.0	-1.0	0	-1.0	-1.0	-1.0	0	None	0	1	1.88	12.25	0.732398	None	None
63n.AUMV1	211	210	1	C/C	99.0	793	chr22	29083904	29083905	C	snp	tv	0.00757575757576	65	1	0	0	0.950550440504	CHEK2	16	ENST00000382580	Gtg/Ttg	p.Val581Leu/c.1741G>T	586	None	protein_coding	missense_variant	MED	0	None	0	-1.0	-1.0	0	-1.0	-1.0	0	-1.0	-1.0	-1.0	0	None	0	1	1.88	12.25	0.732398	None	None
7.A8P8B	242	240	2	C/C	99.0	793	chr22	29083904	29083905	C	snp	tv	0.00757575757576	65	1	0	0	0.950550440504	CHEK2	16	ENST00000382580	Gtg/Ttg	p.Val581Leu/c.1741G>T	586	None	protein_coding	missense_variant	MED	0	None	0	-1.0	-1.0	0	-1.0	-1.0	0	-1.0	-1.0	-1.0	0	None	0	1	1.88	12.25	0.732398	None	None
72.ATR2U	631	631	0	C/C	99.0	793	chr22	29083904	29083905	C	snp	tv	0.00757575757576	65	1	0	0	0.950550440504	CHEK2	16	ENST00000382580	Gtg/Ttg	p.Val581Leu/c.1741G>T	586	None	protein_coding	missense_variant	MED	0	None	0	-1.0	-1.0	0	-1.0	-1.0	0	-1.0	-1.0	-1.0	0	None	0	1	1.88	12.25	0.732398	None	None
82.ATR2U	416	415	1	C/C	99.0	793	chr22	29083904	29083905	C	snp	tv	0.00757575757576	65	1	0	0	0.950550440504	CHEK2	16	ENST00000382580	Gtg/Ttg	p.Val581Leu/c.1741G>T	586	None	protein_coding	missense_variant	MED	0	None	0	-1.0	-1.0	0	-1.0	-1.0	0	-1.0	-1.0	-1.0	0	None	0	1	1.88	12.25	0.732398	None	None
84.ATR2U	612	605	7	C/C	99.0	793	chr22	29083904	29083905	C	snp	tv	0.00757575757576	65	1	0	0	0.950550440504	CHEK2	16	ENST00000382580	Gtg/Ttg	p.Val581Leu/c.1741G>T	586	None	protein_coding	missense_variant	MED	0	None	0	-1.0	-1.0	0	-1.0	-1.0	0	-1.0	-1.0	-1.0	0	None	0	1	1.88	12.25	0.732398	None	None
91n.AUMV1	186	185	1	C/C	99.0	793	chr22	29083904	29083905	C	snp	tv	0.00757575757576	65	1	0	0	0.950550440504	CHEK2	16	ENST00000382580	Gtg/Ttg	p.Val581Leu/c.1741G>T	586	None	protein_coding	missense_variant	MED	0	None	0	-1.0	-1.0	0	-1.0	-1.0	0	-1.0	-1.0	-1.0	0	None	0	1	1.88	12.25	0.732398	None	None
BS2.ATU14	28	28	0	C/C	48.0	793	chr22	29083904	29083905	C	snp	tv	0.00757575757576	65	1	0	0	0.950550440504	CHEK2	16	ENST00000382580	Gtg/Ttg	p.Val581Leu/c.1741G>T	586	None	protein_coding	missense_variant	MED	0	None	0	-1.0	-1.0	0	-1.0	-1.0	0	-1.0	-1.0	-1.0	0	None	0	1	1.88	12.25	0.732398	None	None
PS1.A8P8B	203	203	0	C/C	99.0	793	chr22	29083904	29083905	C	snp	tv	0.00757575757576	65	1	0	0	0.950550440504	CHEK2	16	ENST00000382580	Gtg/Ttg	p.Val581Leu/c.1741G>T	586	None	protein_coding	missense_variant	MED	0	None	0	-1.0	-1.0	0	-1.0	-1.0	0	-1.0	-1.0	-1.0	0	None	0	1	1.88	12.25	0.732398	None	None
PS2.A8P8B	195	193	2	C/C	99.0	793	chr22	29083904	29083905	C	snp	tv	0.00757575757576	65	1	0	0	0.950550440504	CHEK2	16	ENST00000382580	Gtg/Ttg	p.Val581Leu/c.1741G>T	586	None	protein_coding	missense_variant	MED	0	None	0	-1.0	-1.0	0	-1.0	-1.0	0	-1.0	-1.0	-1.0	0	None	0	1	1.88	12.25	0.732398	None	None
SA23.ATU14	99	99	0	C/C	99.0	793	chr22	29083904	29083905	C	snp	tv	0.00757575757576	65	1	0	0	0.950550440504	CHEK2	16	ENST00000382580	Gtg/Ttg	p.Val581Leu/c.1741G>T	586	None	protein_coding	missense_variant	MED	0	None	0	-1.0	-1.0	0	-1.0	-1.0	0	-1.0	-1.0	-1.0	0	None	0	1	1.88	12.25	0.732398	None	None
SA33.ATU14	13	13	0	C/C	30.0	793	chr22	29083904	29083905	C	snp	tv	0.00757575757576	65	1	0	0	0.950550440504	CHEK2	16	ENST00000382580	Gtg/Ttg	p.Val581Leu/c.1741G>T	586	None	protein_coding	missense_variant	MED	0	None	0	-1.0	-1.0	0	-1.0	-1.0	0	-1.0	-1.0	-1.0	0	None	0	1	1.88	12.25	0.732398	None	None
SA36.A8P8B	87	87	0	C/C	99.0	793	chr22	29083904	29083905	C	snp	tv	0.00757575757576	65	1	0	0	0.950550440504	CHEK2	16	ENST00000382580	Gtg/Ttg	p.Val581Leu/c.1741G>T	586	None	protein_coding	missense_variant	MED	0	None	0	-1.0	-1.0	0	-1.0	-1.0	0	-1.0	-1.0	-1.0	0	None	0	1	1.88	12.25	0.732398	None	None
SA38.ATU14	10	10	0	C/C	30.0	793	chr22	29083904	29083905	C	snp	tv	0.00757575757576	65	1	0	0	0.950550440504	CHEK2	16	ENST00000382580	Gtg/Ttg	p.Val581Leu/c.1741G>T	586	None	protein_coding	missense_variant	MED	0	None	0	-1.0	-1.0	0	-1.0	-1.0	0	-1.0	-1.0	-1.0	0	None	0	1	1.88	12.25	0.732398	None	None
SA41.ATU14	194	194	0	C/C	99.0	793	chr22	29083904	29083905	C	snp	tv	0.00757575757576	65	1	0	0	0.950550440504	CHEK2	16	ENST00000382580	Gtg/Ttg	p.Val581Leu/c.1741G>T	586	None	protein_coding	missense_variant	MED	0	None	0	-1.0	-1.0	0	-1.0	-1.0	0	-1.0	-1.0	-1.0	0	None	0	1	1.88	12.25	0.732398	None	None
Y102.ATU14	16	16	0	C/C	33.0	793	chr22	29083904	29083905	C	snp	tv	0.00757575757576	65	1	0	0	0.950550440504	CHEK2	16	ENST00000382580	Gtg/Ttg	p.Val581Leu/c.1741G>T	586	None	protein_coding	missense_variant	MED	0	None	0	-1.0	-1.0	0	-1.0	-1.0	0	-1.0	-1.0	-1.0	0	None	0	1	1.88	12.25	0.732398	None	None
Y105.ATU14	35	35	0	C/C	84.0	793	chr22	29083904	29083905	C	snp	tv	0.00757575757576	65	1	0	0	0.950550440504	CHEK2	16	ENST00000382580	Gtg/Ttg	p.Val581Leu/c.1741G>T	586	None	protein_coding	missense_variant	MED	0	None	0	-1.0	-1.0	0	-1.0	-1.0	0	-1.0	-1.0	-1.0	0	None	0	1	1.88	12.25	0.732398	None	None
Y115B.ATU14	78	76	2	C/C	99.0	793	chr22	29083904	29083905	C	snp	tv	0.00757575757576	65	1	0	0	0.950550440504	CHEK2	16	ENST00000382580	Gtg/Ttg	p.Val581Leu/c.1741G>T	586	None	protein_coding	missense_variant	MED	0	None	0	-1.0	-1.0	0	-1.0	-1.0	0	-1.0	-1.0	-1.0	0	None	0	1	1.88	12.25	0.732398	None	None
Y123B.ATU14	136	136	0	C/C	99.0	793	chr22	29083904	29083905	C	snp	tv	0.00757575757576	65	1	0	0	0.950550440504	CHEK2	16	ENST00000382580	Gtg/Ttg	p.Val581Leu/c.1741G>T	586	None	protein_coding	missense_variant	MED	0	None	0	-1.0	-1.0	0	-1.0	-1.0	0	-1.0	-1.0	-1.0	0	None	0	1	1.88	12.25	0.732398	None	None
Y135.ATU14	349	349	0	C/C	99.0	793	chr22	29083904	29083905	C	snp	tv	0.00757575757576	65	1	0	0	0.950550440504	CHEK2	16	ENST00000382580	Gtg/Ttg	p.Val581Leu/c.1741G>T	586	None	protein_coding	missense_variant	MED	0	None	0	-1.0	-1.0	0	-1.0	-1.0	0	-1.0	-1.0	-1.0	0	None	0	1	1.88	12.25	0.732398	None	None
Y137B.ATU14	70	70	0	C/C	78.0	793	chr22	29083904	29083905	C	snp	tv	0.00757575757576	65	1	0	0	0.950550440504	CHEK2	16	ENST00000382580	Gtg/Ttg	p.Val581Leu/c.1741G>T	586	None	protein_coding	missense_variant	MED	0	None	0	-1.0	-1.0	0	-1.0	-1.0	0	-1.0	-1.0	-1.0	0	None	0	1	1.88	12.25	0.732398	None	None
Y143C.ATU14	54	54	0	C/C	99.0	793	chr22	29083904	29083905	C	snp	tv	0.00757575757576	65	1	0	0	0.950550440504	CHEK2	16	ENST00000382580	Gtg/Ttg	p.Val581Leu/c.1741G>T	586	None	protein_coding	missense_variant	MED	0	None	0	-1.0	-1.0	0	-1.0	-1.0	0	-1.0	-1.0	-1.0	0	None	0	1	1.88	12.25	0.732398	None	None
Y145B.ATU14	457	454	3	C/C	99.0	793	chr22	29083904	29083905	C	snp	tv	0.00757575757576	65	1	0	0	0.950550440504	CHEK2	16	ENST00000382580	Gtg/Ttg	p.Val581Leu/c.1741G>T	586	None	protein_coding	missense_variant	MED	0	None	0	-1.0	-1.0	0	-1.0	-1.0	0	-1.0	-1.0	-1.0	0	None	0	1	1.88	12.25	0.732398	None	None
Y146B.A8P8B	109	109	0	C/C	99.0	793	chr22	29083904	29083905	C	snp	tv	0.00757575757576	65	1	0	0	0.950550440504	CHEK2	16	ENST00000382580	Gtg/Ttg	p.Val581Leu/c.1741G>T	586	None	protein_coding	missense_variant	MED	0	None	0	-1.0	-1.0	0	-1.0	-1.0	0	-1.0	-1.0	-1.0	0	None	0	1	1.88	12.25	0.732398	None	None
Y151B.ATU14	85	85	0	C/C	99.0	793	chr22	29083904	29083905	C	snp	tv	0.00757575757576	65	1	0	0	0.950550440504	CHEK2	16	ENST00000382580	Gtg/Ttg	p.Val581Leu/c.1741G>T	586	None	protein_coding	missense_variant	MED	0	None	0	-1.0	-1.0	0	-1.0	-1.0	0	-1.0	-1.0	-1.0	0	None	0	1	1.88	12.25	0.732398	None	None
Y159C.ATU14	136	135	1	C/C	99.0	793	chr22	29083904	29083905	C	snp	tv	0.00757575757576	65	1	0	0	0.950550440504	CHEK2	16	ENST00000382580	Gtg/Ttg	p.Val581Leu/c.1741G>T	586	None	protein_coding	missense_variant	MED	0	None	0	-1.0	-1.0	0	-1.0	-1.0	0	-1.0	-1.0	-1.0	0	None	0	1	1.88	12.25	0.732398	None	None
Y161C.ATU14	71	71	0	C/C	99.0	793	chr22	29083904	29083905	C	snp	tv	0.00757575757576	65	1	0	0	0.950550440504	CHEK2	16	ENST00000382580	Gtg/Ttg	p.Val581Leu/c.1741G>T	586	None	protein_coding	missense_variant	MED	0	None	0	-1.0	-1.0	0	-1.0	-1.0	0	-1.0	-1.0	-1.0	0	None	0	1	1.88	12.25	0.732398	None	None
Y165B.ATU14	116	116	0	C/C	99.0	793	chr22	29083904	29083905	C	snp	tv	0.00757575757576	65	1	0	0	0.950550440504	CHEK2	16	ENST00000382580	Gtg/Ttg	p.Val581Leu/c.1741G>T	586	None	protein_coding	missense_variant	MED	0	None	0	-1.0	-1.0	0	-1.0	-1.0	0	-1.0	-1.0	-1.0	0	None	0	1	1.88	12.25	0.732398	None	None
Y167B.A8P8B	94	94	0	C/C	99.0	793	chr22	29083904	29083905	C	snp	tv	0.00757575757576	65	1	0	0	0.950550440504	CHEK2	16	ENST00000382580	Gtg/Ttg	p.Val581Leu/c.1741G>T	586	None	protein_coding	missense_variant	MED	0	None	0	-1.0	-1.0	0	-1.0	-1.0	0	-1.0	-1.0	-1.0	0	None	0	1	1.88	12.25	0.732398	None	None
Y168C.A8P8B	41	41	0	C/C	99.0	793	chr22	29083904	29083905	C	snp	tv	0.00757575757576	65	1	0	0	0.950550440504	CHEK2	16	ENST00000382580	Gtg/Ttg	p.Val581Leu/c.1741G>T	586	None	protein_coding	missense_variant	MED	0	None	0	-1.0	-1.0	0	-1.0	-1.0	0	-1.0	-1.0	-1.0	0	None	0	1	1.88	12.25	0.732398	None	None
Y169C.ATU14	58	58	0	C/C	99.0	793	chr22	29083904	29083905	C	snp	tv	0.00757575757576	65	1	0	0	0.950550440504	CHEK2	16	ENST00000382580	Gtg/Ttg	p.Val581Leu/c.1741G>T	586	None	protein_coding	missense_variant	MED	0	None	0	-1.0	-1.0	0	-1.0	-1.0	0	-1.0	-1.0	-1.0	0	None	0	1	1.88	12.25	0.732398	None	None
ps4.AL9E5	212	211	1	C/C	99.0	793	chr22	29083904	29083905	C	snp	tv	0.00757575757576	65	1	0	0	0.950550440504	CHEK2	16	ENST00000382580	Gtg/Ttg	p.Val581Leu/c.1741G>T	586	None	protein_coding	missense_variant	MED	0	None	0	-1.0	-1.0	0	-1.0	-1.0	0	-1.0	-1.0	-1.0	0	None	0	1	1.88	12.25	0.732398	None	None
ps6.AUMV1	88	88	0	C/C	99.0	793	chr22	29083904	29083905	C	snp	tv	0.00757575757576	65	1	0	0	0.950550440504	CHEK2	16	ENST00000382580	Gtg/Ttg	p.Val581Leu/c.1741G>T	586	None	protein_coding	missense_variant	MED	0	None	0	-1.0	-1.0	0	-1.0	-1.0	0	-1.0	-1.0	-1.0	0	None	0	1	1.88	12.25	0.732398	None	None
sa14.AL9E5	346	345	1	C/C	99.0	793	chr22	29083904	29083905	C	snp	tv	0.00757575757576	65	1	0	0	0.950550440504	CHEK2	16	ENST00000382580	Gtg/Ttg	p.Val581Leu/c.1741G>T	586	None	protein_coding	missense_variant	MED	0	None	0	-1.0	-1.0	0	-1.0	-1.0	0	-1.0	-1.0	-1.0	0	None	0	1	1.88	12.25	0.732398	None	None
sa39.AL9E5	139	139	0	C/C	99.0	793	chr22	29083904	29083905	C	snp	tv	0.00757575757576	65	1	0	0	0.950550440504	CHEK2	16	ENST00000382580	Gtg/Ttg	p.Val581Leu/c.1741G>T	586	None	protein_coding	missense_variant	MED	0	None	0	-1.0	-1.0	0	-1.0	-1.0	0	-1.0	-1.0	-1.0	0	None	0	1	1.88	12.25	0.732398	None	None
sa40.ATR2U	132	132	0	C/C	99.0	793	chr22	29083904	29083905	C	snp	tv	0.00757575757576	65	1	0	0	0.950550440504	CHEK2	16	ENST00000382580	Gtg/Ttg	p.Val581Leu/c.1741G>T	586	None	protein_coding	missense_variant	MED	0	None	0	-1.0	-1.0	0	-1.0	-1.0	0	-1.0	-1.0	-1.0	0	None	0	1	1.88	12.25	0.732398	None	None
y103.AUMV1	253	252	1	C/C	99.0	793	chr22	29083904	29083905	C	snp	tv	0.00757575757576	65	1	0	0	0.950550440504	CHEK2	16	ENST00000382580	Gtg/Ttg	p.Val581Leu/c.1741G>T	586	None	protein_coding	missense_variant	MED	0	None	0	-1.0	-1.0	0	-1.0	-1.0	0	-1.0	-1.0	-1.0	0	None	0	1	1.88	12.25	0.732398	None	None
y104.ATR2U	90	90	0	C/C	99.0	793	chr22	29083904	29083905	C	snp	tv	0.00757575757576	65	1	0	0	0.950550440504	CHEK2	16	ENST00000382580	Gtg/Ttg	p.Val581Leu/c.1741G>T	586	None	protein_coding	missense_variant	MED	0	None	0	-1.0	-1.0	0	-1.0	-1.0	0	-1.0	-1.0	-1.0	0	None	0	1	1.88	12.25	0.732398	None	None
y109b.AUMV1	17	17	0	C/C	48.0	793	chr22	29083904	29083905	C	snp	tv	0.00757575757576	65	1	0	0	0.950550440504	CHEK2	16	ENST00000382580	Gtg/Ttg	p.Val581Leu/c.1741G>T	586	None	protein_coding	missense_variant	MED	0	None	0	-1.0	-1.0	0	-1.0	-1.0	0	-1.0	-1.0	-1.0	0	None	0	1	1.88	12.25	0.732398	None	None
y110b.AUMV1	24	24	0	C/C	60.0	793	chr22	29083904	29083905	C	snp	tv	0.00757575757576	65	1	0	0	0.950550440504	CHEK2	16	ENST00000382580	Gtg/Ttg	p.Val581Leu/c.1741G>T	586	None	protein_coding	missense_variant	MED	0	None	0	-1.0	-1.0	0	-1.0	-1.0	0	-1.0	-1.0	-1.0	0	None	0	1	1.88	12.25	0.732398	None	None
y128b.AUMV1	166	165	1	C/C	99.0	793	chr22	29083904	29083905	C	snp	tv	0.00757575757576	65	1	0	0	0.950550440504	CHEK2	16	ENST00000382580	Gtg/Ttg	p.Val581Leu/c.1741G>T	586	None	protein_coding	missense_variant	MED	0	None	0	-1.0	-1.0	0	-1.0	-1.0	0	-1.0	-1.0	-1.0	0	None	0	1	1.88	12.25	0.732398	None	None
y132b.AUMV1	15	15	0	C/C	30.0	793	chr22	29083904	29083905	C	snp	tv	0.00757575757576	65	1	0	0	0.950550440504	CHEK2	16	ENST00000382580	Gtg/Ttg	p.Val581Leu/c.1741G>T	586	None	protein_coding	missense_variant	MED	0	None	0	-1.0	-1.0	0	-1.0	-1.0	0	-1.0	-1.0	-1.0	0	None	0	1	1.88	12.25	0.732398	None	None
y134b.AL9E5	204	204	0	C/C	99.0	793	chr22	29083904	29083905	C	snp	tv	0.00757575757576	65	1	0	0	0.950550440504	CHEK2	16	ENST00000382580	Gtg/Ttg	p.Val581Leu/c.1741G>T	586	None	protein_coding	missense_variant	MED	0	None	0	-1.0	-1.0	0	-1.0	-1.0	0	-1.0	-1.0	-1.0	0	None	0	1	1.88	12.25	0.732398	None	None
y144c.AUMV1	137	136	1	C/C	99.0	793	chr22	29083904	29083905	C	snp	tv	0.00757575757576	65	1	0	0	0.950550440504	CHEK2	16	ENST00000382580	Gtg/Ttg	p.Val581Leu/c.1741G>T	586	None	protein_coding	missense_variant	MED	0	None	0	-1.0	-1.0	0	-1.0	-1.0	0	-1.0	-1.0	-1.0	0	None	0	1	1.88	12.25	0.732398	None	None
y147c.AUMV1	186	186	0	C/C	99.0	793	chr22	29083904	29083905	C	snp	tv	0.00757575757576	65	1	0	0	0.950550440504	CHEK2	16	ENST00000382580	Gtg/Ttg	p.Val581Leu/c.1741G>T	586	None	protein_coding	missense_variant	MED	0	None	0	-1.0	-1.0	0	-1.0	-1.0	0	-1.0	-1.0	-1.0	0	None	0	1	1.88	12.25	0.732398	None	None
y162c.ATR2U	81	81	0	C/C	99.0	793	chr22	29083904	29083905	C	snp	tv	0.00757575757576	65	1	0	0	0.950550440504	CHEK2	16	ENST00000382580	Gtg/Ttg	p.Val581Leu/c.1741G>T	586	None	protein_coding	missense_variant	MED	0	None	0	-1.0	-1.0	0	-1.0	-1.0	0	-1.0	-1.0	-1.0	0	None	0	1	1.88	12.25	0.732398	None	None
y179f.AL9E5	361	361	0	C/C	99.0	793	chr22	29083904	29083905	C	snp	tv	0.00757575757576	65	1	0	0	0.950550440504	CHEK2	16	ENST00000382580	Gtg/Ttg	p.Val581Leu/c.1741G>T	586	None	protein_coding	missense_variant	MED	0	None	0	-1.0	-1.0	0	-1.0	-1.0	0	-1.0	-1.0	-1.0	0	None	0	1	1.88	12.25	0.732398	None	None
y183b.AUMV1	104	103	1	C/C	99.0	793	chr22	29083904	29083905	C	snp	tv	0.00757575757576	65	1	0	0	0.950550440504	CHEK2	16	ENST00000382580	Gtg/Ttg	p.Val581Leu/c.1741G>T	586	None	protein_coding	missense_variant	MED	0	None	0	-1.0	-1.0	0	-1.0	-1.0	0	-1.0	-1.0	-1.0	0	None	0	1	1.88	12.25	0.732398	None	None
y188b.AUMV1	94	94	0	C/C	99.0	793	chr22	29083904	29083905	C	snp	tv	0.00757575757576	65	1	0	0	0.950550440504	CHEK2	16	ENST00000382580	Gtg/Ttg	p.Val581Leu/c.1741G>T	586	None	protein_coding	missense_variant	MED	0	None	0	-1.0	-1.0	0	-1.0	-1.0	0	-1.0	-1.0	-1.0	0	None	0	1	1.88	12.25	0.732398	None	None
y199b.AL9E5	289	289	0	C/C	99.0	793	chr22	29083904	29083905	C	snp	tv	0.00757575757576	65	1	0	0	0.950550440504	CHEK2	16	ENST00000382580	Gtg/Ttg	p.Val581Leu/c.1741G>T	586	None	protein_coding	missense_variant	MED	0	None	0	-1.0	-1.0	0	-1.0	-1.0	0	-1.0	-1.0	-1.0	0	None	0	1	1.88	12.25	0.732398	None	None
y3.AUMV1	20	20	0	C/C	48.0	793	chr22	29083904	29083905	C	snp	tv	0.00757575757576	65	1	0	0	0.950550440504	CHEK2	16	ENST00000382580	Gtg/Ttg	p.Val581Leu/c.1741G>T	586	None	protein_coding	missense_variant	MED	0	None	0	-1.0	-1.0	0	-1.0	-1.0	0	-1.0	-1.0	-1.0	0	None	0	1	1.88	12.25	0.732398	None	None
y68.ATR2U	166	166	0	C/C	99.0	793	chr22	29083904	29083905	C	snp	tv	0.00757575757576	65	1	0	0	0.950550440504	CHEK2	16	ENST00000382580	Gtg/Ttg	p.Val581Leu/c.1741G>T	586	None	protein_coding	missense_variant	MED	0	None	0	-1.0	-1.0	0	-1.0	-1.0	0	-1.0	-1.0	-1.0	0	None	0	1	1.88	12.25	0.732398	None	None
y77.AL9E5	175	175	0	C/C	99.0	793	chr22	29083904	29083905	C	snp	tv	0.00757575757576	65	1	0	0	0.950550440504	CHEK2	16	ENST00000382580	Gtg/Ttg	p.Val581Leu/c.1741G>T	586	None	protein_coding	missense_variant	MED	0	None	0	-1.0	-1.0	0	-1.0	-1.0	0	-1.0	-1.0	-1.0	0	None	0	1	1.88	12.25	0.732398	None	None
y88.AUMV1	18	14	4	C/A	85.0	793	chr22	29083904	29083905	C	snp	tv	0.00757575757576	65	1	0	0	0.950550440504	CHEK2	16	ENST00000382580	Gtg/Ttg	p.Val581Leu/c.1741G>T	586	None	protein_coding	missense_variant	MED	0	None	0	-1.0	-1.0	0	-1.0	-1.0	0	-1.0	-1.0	-1.0	0	None	0	1	1.88	12.25	0.732398	None	None
1.ATR2U	139	139	0	G/G	99.0	794	chr22	29091185	29091186	G	snp	ts	0.00757575757576	65	1	0	0	0.950550440504	CHEK2	13	ENST00000382580	tCa/tTa	p.Ser478Leu/c.1433C>T	586	Pkinase	protein_coding	missense_variant	MED	0	None	0	-1.0	-1.0	0	-1.0	-1.0	0	-1.0	-1.0	-1.0	0	None	0	1	4.95	28.8	0.732398	None	None
10.ATU14	136	136	0	G/G	99.0	794	chr22	29091185	29091186	G	snp	ts	0.00757575757576	65	1	0	0	0.950550440504	CHEK2	13	ENST00000382580	tCa/tTa	p.Ser478Leu/c.1433C>T	586	Pkinase	protein_coding	missense_variant	MED	0	None	0	-1.0	-1.0	0	-1.0	-1.0	0	-1.0	-1.0	-1.0	0	None	0	1	4.95	28.8	0.732398	None	None
17.AUMV1	164	164	0	G/G	99.0	794	chr22	29091185	29091186	G	snp	ts	0.00757575757576	65	1	0	0	0.950550440504	CHEK2	13	ENST00000382580	tCa/tTa	p.Ser478Leu/c.1433C>T	586	Pkinase	protein_coding	missense_variant	MED	0	None	0	-1.0	-1.0	0	-1.0	-1.0	0	-1.0	-1.0	-1.0	0	None	0	1	4.95	28.8	0.732398	None	None
2.ATR2U	376	376	0	G/G	99.0	794	chr22	29091185	29091186	G	snp	ts	0.00757575757576	65	1	0	0	0.950550440504	CHEK2	13	ENST00000382580	tCa/tTa	p.Ser478Leu/c.1433C>T	586	Pkinase	protein_coding	missense_variant	MED	0	None	0	-1.0	-1.0	0	-1.0	-1.0	0	-1.0	-1.0	-1.0	0	None	0	1	4.95	28.8	0.732398	None	None
21.AL9E5	53	53	0	G/G	99.0	794	chr22	29091185	29091186	G	snp	ts	0.00757575757576	65	1	0	0	0.950550440504	CHEK2	13	ENST00000382580	tCa/tTa	p.Ser478Leu/c.1433C>T	586	Pkinase	protein_coding	missense_variant	MED	0	None	0	-1.0	-1.0	0	-1.0	-1.0	0	-1.0	-1.0	-1.0	0	None	0	1	4.95	28.8	0.732398	None	None
22.AUMV1	213	213	0	G/G	99.0	794	chr22	29091185	29091186	G	snp	ts	0.00757575757576	65	1	0	0	0.950550440504	CHEK2	13	ENST00000382580	tCa/tTa	p.Ser478Leu/c.1433C>T	586	Pkinase	protein_coding	missense_variant	MED	0	None	0	-1.0	-1.0	0	-1.0	-1.0	0	-1.0	-1.0	-1.0	0	None	0	1	4.95	28.8	0.732398	None	None
26.ATU14	145	145	0	G/G	99.0	794	chr22	29091185	29091186	G	snp	ts	0.00757575757576	65	1	0	0	0.950550440504	CHEK2	13	ENST00000382580	tCa/tTa	p.Ser478Leu/c.1433C>T	586	Pkinase	protein_coding	missense_variant	MED	0	None	0	-1.0	-1.0	0	-1.0	-1.0	0	-1.0	-1.0	-1.0	0	None	0	1	4.95	28.8	0.732398	None	None
31.ATU14	228	228	0	G/G	99.0	794	chr22	29091185	29091186	G	snp	ts	0.00757575757576	65	1	0	0	0.950550440504	CHEK2	13	ENST00000382580	tCa/tTa	p.Ser478Leu/c.1433C>T	586	Pkinase	protein_coding	missense_variant	MED	0	None	0	-1.0	-1.0	0	-1.0	-1.0	0	-1.0	-1.0	-1.0	0	None	0	1	4.95	28.8	0.732398	None	None
35.ATU14	62	62	0	G/G	99.0	794	chr22	29091185	29091186	G	snp	ts	0.00757575757576	65	1	0	0	0.950550440504	CHEK2	13	ENST00000382580	tCa/tTa	p.Ser478Leu/c.1433C>T	586	Pkinase	protein_coding	missense_variant	MED	0	None	0	-1.0	-1.0	0	-1.0	-1.0	0	-1.0	-1.0	-1.0	0	None	0	1	4.95	28.8	0.732398	None	None
37.ATU14	88	88	0	G/G	99.0	794	chr22	29091185	29091186	G	snp	ts	0.00757575757576	65	1	0	0	0.950550440504	CHEK2	13	ENST00000382580	tCa/tTa	p.Ser478Leu/c.1433C>T	586	Pkinase	protein_coding	missense_variant	MED	0	None	0	-1.0	-1.0	0	-1.0	-1.0	0	-1.0	-1.0	-1.0	0	None	0	1	4.95	28.8	0.732398	None	None
45.ATU14	139	139	0	G/G	99.0	794	chr22	29091185	29091186	G	snp	ts	0.00757575757576	65	1	0	0	0.950550440504	CHEK2	13	ENST00000382580	tCa/tTa	p.Ser478Leu/c.1433C>T	586	Pkinase	protein_coding	missense_variant	MED	0	None	0	-1.0	-1.0	0	-1.0	-1.0	0	-1.0	-1.0	-1.0	0	None	0	1	4.95	28.8	0.732398	None	None
5.ATR2U	383	383	0	G/G	99.0	794	chr22	29091185	29091186	G	snp	ts	0.00757575757576	65	1	0	0	0.950550440504	CHEK2	13	ENST00000382580	tCa/tTa	p.Ser478Leu/c.1433C>T	586	Pkinase	protein_coding	missense_variant	MED	0	None	0	-1.0	-1.0	0	-1.0	-1.0	0	-1.0	-1.0	-1.0	0	None	0	1	4.95	28.8	0.732398	None	None
63n.AUMV1	281	281	0	G/G	99.0	794	chr22	29091185	29091186	G	snp	ts	0.00757575757576	65	1	0	0	0.950550440504	CHEK2	13	ENST00000382580	tCa/tTa	p.Ser478Leu/c.1433C>T	586	Pkinase	protein_coding	missense_variant	MED	0	None	0	-1.0	-1.0	0	-1.0	-1.0	0	-1.0	-1.0	-1.0	0	None	0	1	4.95	28.8	0.732398	None	None
7.A8P8B	246	243	3	G/G	99.0	794	chr22	29091185	29091186	G	snp	ts	0.00757575757576	65	1	0	0	0.950550440504	CHEK2	13	ENST00000382580	tCa/tTa	p.Ser478Leu/c.1433C>T	586	Pkinase	protein_coding	missense_variant	MED	0	None	0	-1.0	-1.0	0	-1.0	-1.0	0	-1.0	-1.0	-1.0	0	None	0	1	4.95	28.8	0.732398	None	None
72.ATR2U	567	566	1	G/G	99.0	794	chr22	29091185	29091186	G	snp	ts	0.00757575757576	65	1	0	0	0.950550440504	CHEK2	13	ENST00000382580	tCa/tTa	p.Ser478Leu/c.1433C>T	586	Pkinase	protein_coding	missense_variant	MED	0	None	0	-1.0	-1.0	0	-1.0	-1.0	0	-1.0	-1.0	-1.0	0	None	0	1	4.95	28.8	0.732398	None	None
82.ATR2U	378	378	0	G/G	99.0	794	chr22	29091185	29091186	G	snp	ts	0.00757575757576	65	1	0	0	0.950550440504	CHEK2	13	ENST00000382580	tCa/tTa	p.Ser478Leu/c.1433C>T	586	Pkinase	protein_coding	missense_variant	MED	0	None	0	-1.0	-1.0	0	-1.0	-1.0	0	-1.0	-1.0	-1.0	0	None	0	1	4.95	28.8	0.732398	None	None
84.ATR2U	518	518	0	G/G	99.0	794	chr22	29091185	29091186	G	snp	ts	0.00757575757576	65	1	0	0	0.950550440504	CHEK2	13	ENST00000382580	tCa/tTa	p.Ser478Leu/c.1433C>T	586	Pkinase	protein_coding	missense_variant	MED	0	None	0	-1.0	-1.0	0	-1.0	-1.0	0	-1.0	-1.0	-1.0	0	None	0	1	4.95	28.8	0.732398	None	None
91n.AUMV1	171	169	2	G/G	99.0	794	chr22	29091185	29091186	G	snp	ts	0.00757575757576	65	1	0	0	0.950550440504	CHEK2	13	ENST00000382580	tCa/tTa	p.Ser478Leu/c.1433C>T	586	Pkinase	protein_coding	missense_variant	MED	0	None	0	-1.0	-1.0	0	-1.0	-1.0	0	-1.0	-1.0	-1.0	0	None	0	1	4.95	28.8	0.732398	None	None
BS2.ATU14	38	38	0	G/G	99.0	794	chr22	29091185	29091186	G	snp	ts	0.00757575757576	65	1	0	0	0.950550440504	CHEK2	13	ENST00000382580	tCa/tTa	p.Ser478Leu/c.1433C>T	586	Pkinase	protein_coding	missense_variant	MED	0	None	0	-1.0	-1.0	0	-1.0	-1.0	0	-1.0	-1.0	-1.0	0	None	0	1	4.95	28.8	0.732398	None	None
PS1.A8P8B	221	221	0	G/G	99.0	794	chr22	29091185	29091186	G	snp	ts	0.00757575757576	65	1	0	0	0.950550440504	CHEK2	13	ENST00000382580	tCa/tTa	p.Ser478Leu/c.1433C>T	586	Pkinase	protein_coding	missense_variant	MED	0	None	0	-1.0	-1.0	0	-1.0	-1.0	0	-1.0	-1.0	-1.0	0	None	0	1	4.95	28.8	0.732398	None	None
PS2.A8P8B	199	199	0	G/G	99.0	794	chr22	29091185	29091186	G	snp	ts	0.00757575757576	65	1	0	0	0.950550440504	CHEK2	13	ENST00000382580	tCa/tTa	p.Ser478Leu/c.1433C>T	586	Pkinase	protein_coding	missense_variant	MED	0	None	0	-1.0	-1.0	0	-1.0	-1.0	0	-1.0	-1.0	-1.0	0	None	0	1	4.95	28.8	0.732398	None	None
SA23.ATU14	55	55	0	G/G	99.0	794	chr22	29091185	29091186	G	snp	ts	0.00757575757576	65	1	0	0	0.950550440504	CHEK2	13	ENST00000382580	tCa/tTa	p.Ser478Leu/c.1433C>T	586	Pkinase	protein_coding	missense_variant	MED	0	None	0	-1.0	-1.0	0	-1.0	-1.0	0	-1.0	-1.0	-1.0	0	None	0	1	4.95	28.8	0.732398	None	None
SA33.ATU14	9	9	0	G/G	27.0	794	chr22	29091185	29091186	G	snp	ts	0.00757575757576	65	1	0	0	0.950550440504	CHEK2	13	ENST00000382580	tCa/tTa	p.Ser478Leu/c.1433C>T	586	Pkinase	protein_coding	missense_variant	MED	0	None	0	-1.0	-1.0	0	-1.0	-1.0	0	-1.0	-1.0	-1.0	0	None	0	1	4.95	28.8	0.732398	None	None
SA36.A8P8B	80	80	0	G/G	99.0	794	chr22	29091185	29091186	G	snp	ts	0.00757575757576	65	1	0	0	0.950550440504	CHEK2	13	ENST00000382580	tCa/tTa	p.Ser478Leu/c.1433C>T	586	Pkinase	protein_coding	missense_variant	MED	0	None	0	-1.0	-1.0	0	-1.0	-1.0	0	-1.0	-1.0	-1.0	0	None	0	1	4.95	28.8	0.732398	None	None
SA38.ATU14	42	42	0	G/G	99.0	794	chr22	29091185	29091186	G	snp	ts	0.00757575757576	65	1	0	0	0.950550440504	CHEK2	13	ENST00000382580	tCa/tTa	p.Ser478Leu/c.1433C>T	586	Pkinase	protein_coding	missense_variant	MED	0	None	0	-1.0	-1.0	0	-1.0	-1.0	0	-1.0	-1.0	-1.0	0	None	0	1	4.95	28.8	0.732398	None	None
SA41.ATU14	260	260	0	G/G	99.0	794	chr22	29091185	29091186	G	snp	ts	0.00757575757576	65	1	0	0	0.950550440504	CHEK2	13	ENST00000382580	tCa/tTa	p.Ser478Leu/c.1433C>T	586	Pkinase	protein_coding	missense_variant	MED	0	None	0	-1.0	-1.0	0	-1.0	-1.0	0	-1.0	-1.0	-1.0	0	None	0	1	4.95	28.8	0.732398	None	None
Y102.ATU14	24	24	0	G/G	51.0	794	chr22	29091185	29091186	G	snp	ts	0.00757575757576	65	1	0	0	0.950550440504	CHEK2	13	ENST00000382580	tCa/tTa	p.Ser478Leu/c.1433C>T	586	Pkinase	protein_coding	missense_variant	MED	0	None	0	-1.0	-1.0	0	-1.0	-1.0	0	-1.0	-1.0	-1.0	0	None	0	1	4.95	28.8	0.732398	None	None
Y105.ATU14	26	26	0	G/G	66.0	794	chr22	29091185	29091186	G	snp	ts	0.00757575757576	65	1	0	0	0.950550440504	CHEK2	13	ENST00000382580	tCa/tTa	p.Ser478Leu/c.1433C>T	586	Pkinase	protein_coding	missense_variant	MED	0	None	0	-1.0	-1.0	0	-1.0	-1.0	0	-1.0	-1.0	-1.0	0	None	0	1	4.95	28.8	0.732398	None	None
Y115B.ATU14	75	75	0	G/G	99.0	794	chr22	29091185	29091186	G	snp	ts	0.00757575757576	65	1	0	0	0.950550440504	CHEK2	13	ENST00000382580	tCa/tTa	p.Ser478Leu/c.1433C>T	586	Pkinase	protein_coding	missense_variant	MED	0	None	0	-1.0	-1.0	0	-1.0	-1.0	0	-1.0	-1.0	-1.0	0	None	0	1	4.95	28.8	0.732398	None	None
Y123B.ATU14	193	193	0	G/G	99.0	794	chr22	29091185	29091186	G	snp	ts	0.00757575757576	65	1	0	0	0.950550440504	CHEK2	13	ENST00000382580	tCa/tTa	p.Ser478Leu/c.1433C>T	586	Pkinase	protein_coding	missense_variant	MED	0	None	0	-1.0	-1.0	0	-1.0	-1.0	0	-1.0	-1.0	-1.0	0	None	0	1	4.95	28.8	0.732398	None	None
Y135.ATU14	339	339	0	G/G	99.0	794	chr22	29091185	29091186	G	snp	ts	0.00757575757576	65	1	0	0	0.950550440504	CHEK2	13	ENST00000382580	tCa/tTa	p.Ser478Leu/c.1433C>T	586	Pkinase	protein_coding	missense_variant	MED	0	None	0	-1.0	-1.0	0	-1.0	-1.0	0	-1.0	-1.0	-1.0	0	None	0	1	4.95	28.8	0.732398	None	None
Y137B.ATU14	56	56	0	G/G	99.0	794	chr22	29091185	29091186	G	snp	ts	0.00757575757576	65	1	0	0	0.950550440504	CHEK2	13	ENST00000382580	tCa/tTa	p.Ser478Leu/c.1433C>T	586	Pkinase	protein_coding	missense_variant	MED	0	None	0	-1.0	-1.0	0	-1.0	-1.0	0	-1.0	-1.0	-1.0	0	None	0	1	4.95	28.8	0.732398	None	None
Y143C.ATU14	75	75	0	G/G	99.0	794	chr22	29091185	29091186	G	snp	ts	0.00757575757576	65	1	0	0	0.950550440504	CHEK2	13	ENST00000382580	tCa/tTa	p.Ser478Leu/c.1433C>T	586	Pkinase	protein_coding	missense_variant	MED	0	None	0	-1.0	-1.0	0	-1.0	-1.0	0	-1.0	-1.0	-1.0	0	None	0	1	4.95	28.8	0.732398	None	None
Y145B.ATU14	609	607	2	G/G	99.0	794	chr22	29091185	29091186	G	snp	ts	0.00757575757576	65	1	0	0	0.950550440504	CHEK2	13	ENST00000382580	tCa/tTa	p.Ser478Leu/c.1433C>T	586	Pkinase	protein_coding	missense_variant	MED	0	None	0	-1.0	-1.0	0	-1.0	-1.0	0	-1.0	-1.0	-1.0	0	None	0	1	4.95	28.8	0.732398	None	None
Y146B.A8P8B	112	112	0	G/G	99.0	794	chr22	29091185	29091186	G	snp	ts	0.00757575757576	65	1	0	0	0.950550440504	CHEK2	13	ENST00000382580	tCa/tTa	p.Ser478Leu/c.1433C>T	586	Pkinase	protein_coding	missense_variant	MED	0	None	0	-1.0	-1.0	0	-1.0	-1.0	0	-1.0	-1.0	-1.0	0	None	0	1	4.95	28.8	0.732398	None	None
Y148C.A8P8B	16	16	0	G/G	45.0	794	chr22	29091185	29091186	G	snp	ts	0.00757575757576	65	1	0	0	0.950550440504	CHEK2	13	ENST00000382580	tCa/tTa	p.Ser478Leu/c.1433C>T	586	Pkinase	protein_coding	missense_variant	MED	0	None	0	-1.0	-1.0	0	-1.0	-1.0	0	-1.0	-1.0	-1.0	0	None	0	1	4.95	28.8	0.732398	None	None
Y151B.ATU14	53	53	0	G/G	99.0	794	chr22	29091185	29091186	G	snp	ts	0.00757575757576	65	1	0	0	0.950550440504	CHEK2	13	ENST00000382580	tCa/tTa	p.Ser478Leu/c.1433C>T	586	Pkinase	protein_coding	missense_variant	MED	0	None	0	-1.0	-1.0	0	-1.0	-1.0	0	-1.0	-1.0	-1.0	0	None	0	1	4.95	28.8	0.732398	None	None
Y159C.ATU14	143	142	1	G/G	99.0	794	chr22	29091185	29091186	G	snp	ts	0.00757575757576	65	1	0	0	0.950550440504	CHEK2	13	ENST00000382580	tCa/tTa	p.Ser478Leu/c.1433C>T	586	Pkinase	protein_coding	missense_variant	MED	0	None	0	-1.0	-1.0	0	-1.0	-1.0	0	-1.0	-1.0	-1.0	0	None	0	1	4.95	28.8	0.732398	None	None
Y161C.ATU14	41	41	0	G/G	99.0	794	chr22	29091185	29091186	G	snp	ts	0.00757575757576	65	1	0	0	0.950550440504	CHEK2	13	ENST00000382580	tCa/tTa	p.Ser478Leu/c.1433C>T	586	Pkinase	protein_coding	missense_variant	MED	0	None	0	-1.0	-1.0	0	-1.0	-1.0	0	-1.0	-1.0	-1.0	0	None	0	1	4.95	28.8	0.732398	None	None
Y165B.ATU14	108	108	0	G/G	99.0	794	chr22	29091185	29091186	G	snp	ts	0.00757575757576	65	1	0	0	0.950550440504	CHEK2	13	ENST00000382580	tCa/tTa	p.Ser478Leu/c.1433C>T	586	Pkinase	protein_coding	missense_variant	MED	0	None	0	-1.0	-1.0	0	-1.0	-1.0	0	-1.0	-1.0	-1.0	0	None	0	1	4.95	28.8	0.732398	None	None
Y167B.A8P8B	90	90	0	G/G	99.0	794	chr22	29091185	29091186	G	snp	ts	0.00757575757576	65	1	0	0	0.950550440504	CHEK2	13	ENST00000382580	tCa/tTa	p.Ser478Leu/c.1433C>T	586	Pkinase	protein_coding	missense_variant	MED	0	None	0	-1.0	-1.0	0	-1.0	-1.0	0	-1.0	-1.0	-1.0	0	None	0	1	4.95	28.8	0.732398	None	None
Y168C.A8P8B	31	31	0	G/G	93.0	794	chr22	29091185	29091186	G	snp	ts	0.00757575757576	65	1	0	0	0.950550440504	CHEK2	13	ENST00000382580	tCa/tTa	p.Ser478Leu/c.1433C>T	586	Pkinase	protein_coding	missense_variant	MED	0	None	0	-1.0	-1.0	0	-1.0	-1.0	0	-1.0	-1.0	-1.0	0	None	0	1	4.95	28.8	0.732398	None	None
Y169C.ATU14	76	76	0	G/G	99.0	794	chr22	29091185	29091186	G	snp	ts	0.00757575757576	65	1	0	0	0.950550440504	CHEK2	13	ENST00000382580	tCa/tTa	p.Ser478Leu/c.1433C>T	586	Pkinase	protein_coding	missense_variant	MED	0	None	0	-1.0	-1.0	0	-1.0	-1.0	0	-1.0	-1.0	-1.0	0	None	0	1	4.95	28.8	0.732398	None	None
ps6.AUMV1	69	69	0	G/G	99.0	794	chr22	29091185	29091186	G	snp	ts	0.00757575757576	65	1	0	0	0.950550440504	CHEK2	13	ENST00000382580	tCa/tTa	p.Ser478Leu/c.1433C>T	586	Pkinase	protein_coding	missense_variant	MED	0	None	0	-1.0	-1.0	0	-1.0	-1.0	0	-1.0	-1.0	-1.0	0	None	0	1	4.95	28.8	0.732398	None	None
sa14.AL9E5	377	377	0	G/G	99.0	794	chr22	29091185	29091186	G	snp	ts	0.00757575757576	65	1	0	0	0.950550440504	CHEK2	13	ENST00000382580	tCa/tTa	p.Ser478Leu/c.1433C>T	586	Pkinase	protein_coding	missense_variant	MED	0	None	0	-1.0	-1.0	0	-1.0	-1.0	0	-1.0	-1.0	-1.0	0	None	0	1	4.95	28.8	0.732398	None	None
sa39.AL9E5	165	165	0	G/G	99.0	794	chr22	29091185	29091186	G	snp	ts	0.00757575757576	65	1	0	0	0.950550440504	CHEK2	13	ENST00000382580	tCa/tTa	p.Ser478Leu/c.1433C>T	586	Pkinase	protein_coding	missense_variant	MED	0	None	0	-1.0	-1.0	0	-1.0	-1.0	0	-1.0	-1.0	-1.0	0	None	0	1	4.95	28.8	0.732398	None	None
sa40.ATR2U	119	119	0	G/G	99.0	794	chr22	29091185	29091186	G	snp	ts	0.00757575757576	65	1	0	0	0.950550440504	CHEK2	13	ENST00000382580	tCa/tTa	p.Ser478Leu/c.1433C>T	586	Pkinase	protein_coding	missense_variant	MED	0	None	0	-1.0	-1.0	0	-1.0	-1.0	0	-1.0	-1.0	-1.0	0	None	0	1	4.95	28.8	0.732398	None	None
y103.AUMV1	378	378	0	G/G	99.0	794	chr22	29091185	29091186	G	snp	ts	0.00757575757576	65	1	0	0	0.950550440504	CHEK2	13	ENST00000382580	tCa/tTa	p.Ser478Leu/c.1433C>T	586	Pkinase	protein_coding	missense_variant	MED	0	None	0	-1.0	-1.0	0	-1.0	-1.0	0	-1.0	-1.0	-1.0	0	None	0	1	4.95	28.8	0.732398	None	None
y104.ATR2U	78	78	0	G/G	99.0	794	chr22	29091185	29091186	G	snp	ts	0.00757575757576	65	1	0	0	0.950550440504	CHEK2	13	ENST00000382580	tCa/tTa	p.Ser478Leu/c.1433C>T	586	Pkinase	protein_coding	missense_variant	MED	0	None	0	-1.0	-1.0	0	-1.0	-1.0	0	-1.0	-1.0	-1.0	0	None	0	1	4.95	28.8	0.732398	None	None
y109b.AUMV1	56	56	0	G/G	99.0	794	chr22	29091185	29091186	G	snp	ts	0.00757575757576	65	1	0	0	0.950550440504	CHEK2	13	ENST00000382580	tCa/tTa	p.Ser478Leu/c.1433C>T	586	Pkinase	protein_coding	missense_variant	MED	0	None	0	-1.0	-1.0	0	-1.0	-1.0	0	-1.0	-1.0	-1.0	0	None	0	1	4.95	28.8	0.732398	None	None
y110b.AUMV1	49	49	0	G/G	99.0	794	chr22	29091185	29091186	G	snp	ts	0.00757575757576	65	1	0	0	0.950550440504	CHEK2	13	ENST00000382580	tCa/tTa	p.Ser478Leu/c.1433C>T	586	Pkinase	protein_coding	missense_variant	MED	0	None	0	-1.0	-1.0	0	-1.0	-1.0	0	-1.0	-1.0	-1.0	0	None	0	1	4.95	28.8	0.732398	None	None
y128b.AUMV1	291	288	3	G/G	99.0	794	chr22	29091185	29091186	G	snp	ts	0.00757575757576	65	1	0	0	0.950550440504	CHEK2	13	ENST00000382580	tCa/tTa	p.Ser478Leu/c.1433C>T	586	Pkinase	protein_coding	missense_variant	MED	0	None	0	-1.0	-1.0	0	-1.0	-1.0	0	-1.0	-1.0	-1.0	0	None	0	1	4.95	28.8	0.732398	None	None
y132b.AUMV1	18	18	0	G/G	48.0	794	chr22	29091185	29091186	G	snp	ts	0.00757575757576	65	1	0	0	0.950550440504	CHEK2	13	ENST00000382580	tCa/tTa	p.Ser478Leu/c.1433C>T	586	Pkinase	protein_coding	missense_variant	MED	0	None	0	-1.0	-1.0	0	-1.0	-1.0	0	-1.0	-1.0	-1.0	0	None	0	1	4.95	28.8	0.732398	None	None
y134b.AL9E5	235	235	0	G/G	99.0	794	chr22	29091185	29091186	G	snp	ts	0.00757575757576	65	1	0	0	0.950550440504	CHEK2	13	ENST00000382580	tCa/tTa	p.Ser478Leu/c.1433C>T	586	Pkinase	protein_coding	missense_variant	MED	0	None	0	-1.0	-1.0	0	-1.0	-1.0	0	-1.0	-1.0	-1.0	0	None	0	1	4.95	28.8	0.732398	None	None
y144c.AUMV1	132	131	1	G/G	99.0	794	chr22	29091185	29091186	G	snp	ts	0.00757575757576	65	1	0	0	0.950550440504	CHEK2	13	ENST00000382580	tCa/tTa	p.Ser478Leu/c.1433C>T	586	Pkinase	protein_coding	missense_variant	MED	0	None	0	-1.0	-1.0	0	-1.0	-1.0	0	-1.0	-1.0	-1.0	0	None	0	1	4.95	28.8	0.732398	None	None
y147c.AUMV1	304	304	0	G/G	99.0	794	chr22	29091185	29091186	G	snp	ts	0.00757575757576	65	1	0	0	0.950550440504	CHEK2	13	ENST00000382580	tCa/tTa	p.Ser478Leu/c.1433C>T	586	Pkinase	protein_coding	missense_variant	MED	0	None	0	-1.0	-1.0	0	-1.0	-1.0	0	-1.0	-1.0	-1.0	0	None	0	1	4.95	28.8	0.732398	None	None
y162c.ATR2U	75	75	0	G/G	99.0	794	chr22	29091185	29091186	G	snp	ts	0.00757575757576	65	1	0	0	0.950550440504	CHEK2	13	ENST00000382580	tCa/tTa	p.Ser478Leu/c.1433C>T	586	Pkinase	protein_coding	missense_variant	MED	0	None	0	-1.0	-1.0	0	-1.0	-1.0	0	-1.0	-1.0	-1.0	0	None	0	1	4.95	28.8	0.732398	None	None
y179f.AL9E5	416	413	3	G/G	99.0	794	chr22	29091185	29091186	G	snp	ts	0.00757575757576	65	1	0	0	0.950550440504	CHEK2	13	ENST00000382580	tCa/tTa	p.Ser478Leu/c.1433C>T	586	Pkinase	protein_coding	missense_variant	MED	0	None	0	-1.0	-1.0	0	-1.0	-1.0	0	-1.0	-1.0	-1.0	0	None	0	1	4.95	28.8	0.732398	None	None
y183b.AUMV1	118	118	0	G/G	99.0	794	chr22	29091185	29091186	G	snp	ts	0.00757575757576	65	1	0	0	0.950550440504	CHEK2	13	ENST00000382580	tCa/tTa	p.Ser478Leu/c.1433C>T	586	Pkinase	protein_coding	missense_variant	MED	0	None	0	-1.0	-1.0	0	-1.0	-1.0	0	-1.0	-1.0	-1.0	0	None	0	1	4.95	28.8	0.732398	None	None
y188b.AUMV1	144	144	0	G/G	99.0	794	chr22	29091185	29091186	G	snp	ts	0.00757575757576	65	1	0	0	0.950550440504	CHEK2	13	ENST00000382580	tCa/tTa	p.Ser478Leu/c.1433C>T	586	Pkinase	protein_coding	missense_variant	MED	0	None	0	-1.0	-1.0	0	-1.0	-1.0	0	-1.0	-1.0	-1.0	0	None	0	1	4.95	28.8	0.732398	None	None
y199b.AL9E5	441	440	1	G/G	99.0	794	chr22	29091185	29091186	G	snp	ts	0.00757575757576	65	1	0	0	0.950550440504	CHEK2	13	ENST00000382580	tCa/tTa	p.Ser478Leu/c.1433C>T	586	Pkinase	protein_coding	missense_variant	MED	0	None	0	-1.0	-1.0	0	-1.0	-1.0	0	-1.0	-1.0	-1.0	0	None	0	1	4.95	28.8	0.732398	None	None
y3.AUMV1	51	51	0	G/G	99.0	794	chr22	29091185	29091186	G	snp	ts	0.00757575757576	65	1	0	0	0.950550440504	CHEK2	13	ENST00000382580	tCa/tTa	p.Ser478Leu/c.1433C>T	586	Pkinase	protein_coding	missense_variant	MED	0	None	0	-1.0	-1.0	0	-1.0	-1.0	0	-1.0	-1.0	-1.0	0	None	0	1	4.95	28.8	0.732398	None	None
y68.ATR2U	183	183	0	G/G	99.0	794	chr22	29091185	29091186	G	snp	ts	0.00757575757576	65	1	0	0	0.950550440504	CHEK2	13	ENST00000382580	tCa/tTa	p.Ser478Leu/c.1433C>T	586	Pkinase	protein_coding	missense_variant	MED	0	None	0	-1.0	-1.0	0	-1.0	-1.0	0	-1.0	-1.0	-1.0	0	None	0	1	4.95	28.8	0.732398	None	None
y77.AL9E5	172	172	0	G/G	99.0	794	chr22	29091185	29091186	G	snp	ts	0.00757575757576	65	1	0	0	0.950550440504	CHEK2	13	ENST00000382580	tCa/tTa	p.Ser478Leu/c.1433C>T	586	Pkinase	protein_coding	missense_variant	MED	0	None	0	-1.0	-1.0	0	-1.0	-1.0	0	-1.0	-1.0	-1.0	0	None	0	1	4.95	28.8	0.732398	None	None
y88.AUMV1	45	45	0	G/G	99.0	794	chr22	29091185	29091186	G	snp	ts	0.00757575757576	65	1	0	0	0.950550440504	CHEK2	13	ENST00000382580	tCa/tTa	p.Ser478Leu/c.1433C>T	586	Pkinase	protein_coding	missense_variant	MED	0	None	0	-1.0	-1.0	0	-1.0	-1.0	0	-1.0	-1.0	-1.0	0	None	0	1	4.95	28.8	0.732398	None	None
ps4.AL9E5	200	96	104	G/A	99.0	794	chr22	29091185	29091186	G	snp	ts	0.00757575757576	65	1	0	0	0.950550440504	CHEK2	13	ENST00000382580	tCa/tTa	p.Ser478Leu/c.1433C>T	586	Pkinase	protein_coding	missense_variant	MED	0	None	0	-1.0	-1.0	0	-1.0	-1.0	0	-1.0	-1.0	-1.0	0	None	0	1	4.95	28.8	0.732398	None	None
1.ATR2U	139	130	9	T/T	99.0	795	chr22	29091839	29091840	T	snp	ts	0.0378787878788	61	5	0	0	0.749086566952	CHEK2	12	ENST00000382580	Aag/Gag	p.Lys416Glu/c.1246A>G	586	Pkinase	Pkinase	protein_coding	missense_variant		1		rs74751600	0		-1.0	0		-1.0	1	0.026		0.0254555283493	0		0	1	3.75	19.06	0.732398
10.ATU14	104	100	4	T/T	99.0	795	chr22	29091839	29091840	T	snp	ts	0.0378787878788	61	5	0	0	0.749086566952	CHEK2	12	ENST00000382580	Aag/Gag	p.Lys416Glu/c.1246A>G	586	Pkinase	Pkinase	protein_coding	missense_variant		1		rs74751600	0		-1.0	0		-1.0	1	0.026		0.0254555283493	0		0	1	3.75	19.06	0.732398
2.ATR2U	305	298	7	T/T	99.0	795	chr22	29091839	29091840	T	snp	ts	0.0378787878788	61	5	0	0	0.749086566952	CHEK2	12	ENST00000382580	Aag/Gag	p.Lys416Glu/c.1246A>G	586	Pkinase	Pkinase	protein_coding	missense_variant		1		rs74751600	0		-1.0	0		-1.0	1	0.026		0.0254555283493	0		0	1	3.75	19.06	0.732398
21.AL9E5	74	74	0	T/T	99.0	795	chr22	29091839	29091840	T	snp	ts	0.0378787878788	61	5	0	0	0.749086566952	CHEK2	12	ENST00000382580	Aag/Gag	p.Lys416Glu/c.1246A>G	586	Pkinase	Pkinase	protein_coding	missense_variant		1		rs74751600	0		-1.0	0		-1.0	1	0.026		0.0254555283493	0		0	1	3.75	19.06	0.732398
22.AUMV1	216	208	8	T/T	99.0	795	chr22	29091839	29091840	T	snp	ts	0.0378787878788	61	5	0	0	0.749086566952	CHEK2	12	ENST00000382580	Aag/Gag	p.Lys416Glu/c.1246A>G	586	Pkinase	Pkinase	protein_coding	missense_variant		1		rs74751600	0		-1.0	0		-1.0	1	0.026		0.0254555283493	0		0	1	3.75	19.06	0.732398
31.ATU14	229	223	6	T/T	99.0	795	chr22	29091839	29091840	T	snp	ts	0.0378787878788	61	5	0	0	0.749086566952	CHEK2	12	ENST00000382580	Aag/Gag	p.Lys416Glu/c.1246A>G	586	Pkinase	Pkinase	protein_coding	missense_variant		1		rs74751600	0		-1.0	0		-1.0	1	0.026		0.0254555283493	0		0	1	3.75	19.06	0.732398
35.ATU14	57	53	4	T/T	72.0	795	chr22	29091839	29091840	T	snp	ts	0.0378787878788	61	5	0	0	0.749086566952	CHEK2	12	ENST00000382580	Aag/Gag	p.Lys416Glu/c.1246A>G	586	Pkinase	Pkinase	protein_coding	missense_variant		1		rs74751600	0		-1.0	0		-1.0	1	0.026		0.0254555283493	0		0	1	3.75	19.06	0.732398
37.ATU14	55	53	2	T/T	99.0	795	chr22	29091839	29091840	T	snp	ts	0.0378787878788	61	5	0	0	0.749086566952	CHEK2	12	ENST00000382580	Aag/Gag	p.Lys416Glu/c.1246A>G	586	Pkinase	Pkinase	protein_coding	missense_variant		1		rs74751600	0		-1.0	0		-1.0	1	0.026		0.0254555283493	0		0	1	3.75	19.06	0.732398
5.ATR2U	324	324	0	T/T	99.0	795	chr22	29091839	29091840	T	snp	ts	0.0378787878788	61	5	0	0	0.749086566952	CHEK2	12	ENST00000382580	Aag/Gag	p.Lys416Glu/c.1246A>G	586	Pkinase	Pkinase	protein_coding	missense_variant		1		rs74751600	0		-1.0	0		-1.0	1	0.026		0.0254555283493	0		0	1	3.75	19.06	0.732398
63n.AUMV1	229	229	0	T/T	99.0	795	chr22	29091839	29091840	T	snp	ts	0.0378787878788	61	5	0	0	0.749086566952	CHEK2	12	ENST00000382580	Aag/Gag	p.Lys416Glu/c.1246A>G	586	Pkinase	Pkinase	protein_coding	missense_variant		1		rs74751600	0		-1.0	0		-1.0	1	0.026		0.0254555283493	0		0	1	3.75	19.06	0.732398
7.A8P8B	216	198	18	T/T	99.0	795	chr22	29091839	29091840	T	snp	ts	0.0378787878788	61	5	0	0	0.749086566952	CHEK2	12	ENST00000382580	Aag/Gag	p.Lys416Glu/c.1246A>G	586	Pkinase	Pkinase	protein_coding	missense_variant		1		rs74751600	0		-1.0	0		-1.0	1	0.026		0.0254555283493	0		0	1	3.75	19.06	0.732398
72.ATR2U	515	486	29	T/T	99.0	795	chr22	29091839	29091840	T	snp	ts	0.0378787878788	61	5	0	0	0.749086566952	CHEK2	12	ENST00000382580	Aag/Gag	p.Lys416Glu/c.1246A>G	586	Pkinase	Pkinase	protein_coding	missense_variant		1		rs74751600	0		-1.0	0		-1.0	1	0.026		0.0254555283493	0		0	1	3.75	19.06	0.732398
82.ATR2U	330	330	0	T/T	99.0	795	chr22	29091839	29091840	T	snp	ts	0.0378787878788	61	5	0	0	0.749086566952	CHEK2	12	ENST00000382580	Aag/Gag	p.Lys416Glu/c.1246A>G	586	Pkinase	Pkinase	protein_coding	missense_variant		1		rs74751600	0		-1.0	0		-1.0	1	0.026		0.0254555283493	0		0	1	3.75	19.06	0.732398
84.ATR2U	537	535	2	T/T	99.0	795	chr22	29091839	29091840	T	snp	ts	0.0378787878788	61	5	0	0	0.749086566952	CHEK2	12	ENST00000382580	Aag/Gag	p.Lys416Glu/c.1246A>G	586	Pkinase	Pkinase	protein_coding	missense_variant		1		rs74751600	0		-1.0	0		-1.0	1	0.026		0.0254555283493	0		0	1	3.75	19.06	0.732398
91n.AUMV1	141	141	0	T/T	99.0	795	chr22	29091839	29091840	T	snp	ts	0.0378787878788	61	5	0	0	0.749086566952	CHEK2	12	ENST00000382580	Aag/Gag	p.Lys416Glu/c.1246A>G	586	Pkinase	Pkinase	protein_coding	missense_variant		1		rs74751600	0		-1.0	0		-1.0	1	0.026		0.0254555283493	0		0	1	3.75	19.06	0.732398
BS2.ATU14	26	25	1	T/T	56.0	795	chr22	29091839	29091840	T	snp	ts	0.0378787878788	61	5	0	0	0.749086566952	CHEK2	12	ENST00000382580	Aag/Gag	p.Lys416Glu/c.1246A>G	586	Pkinase	Pkinase	protein_coding	missense_variant		1		rs74751600	0		-1.0	0		-1.0	1	0.026		0.0254555283493	0		0	1	3.75	19.06	0.732398
PS1.A8P8B	195	189	6	T/T	99.0	795	chr22	29091839	29091840	T	snp	ts	0.0378787878788	61	5	0	0	0.749086566952	CHEK2	12	ENST00000382580	Aag/Gag	p.Lys416Glu/c.1246A>G	586	Pkinase	Pkinase	protein_coding	missense_variant		1		rs74751600	0		-1.0	0		-1.0	1	0.026		0.0254555283493	0		0	1	3.75	19.06	0.732398
PS2.A8P8B	172	165	7	T/T	99.0	795	chr22	29091839	29091840	T	snp	ts	0.0378787878788	61	5	0	0	0.749086566952	CHEK2	12	ENST00000382580	Aag/Gag	p.Lys416Glu/c.1246A>G	586	Pkinase	Pkinase	protein_coding	missense_variant		1		rs74751600	0		-1.0	0		-1.0	1	0.026		0.0254555283493	0		0	1	3.75	19.06	0.732398
SA23.ATU14	65	61	4	T/T	96.0	795	chr22	29091839	29091840	T	snp	ts	0.0378787878788	61	5	0	0	0.749086566952	CHEK2	12	ENST00000382580	Aag/Gag	p.Lys416Glu/c.1246A>G	586	Pkinase	Pkinase	protein_coding	missense_variant		1		rs74751600	0		-1.0	0		-1.0	1	0.026		0.0254555283493	0		0	1	3.75	19.06	0.732398
SA36.A8P8B	68	66	2	T/T	99.0	795	chr22	29091839	29091840	T	snp	ts	0.0378787878788	61	5	0	0	0.749086566952	CHEK2	12	ENST00000382580	Aag/Gag	p.Lys416Glu/c.1246A>G	586	Pkinase	Pkinase	protein_coding	missense_variant		1		rs74751600	0		-1.0	0		-1.0	1	0.026		0.0254555283493	0		0	1	3.75	19.06	0.732398
SA38.ATU14	25	25	0	T/T	75.0	795	chr22	29091839	29091840	T	snp	ts	0.0378787878788	61	5	0	0	0.749086566952	CHEK2	12	ENST00000382580	Aag/Gag	p.Lys416Glu/c.1246A>G	586	Pkinase	Pkinase	protein_coding	missense_variant		1		rs74751600	0		-1.0	0		-1.0	1	0.026		0.0254555283493	0		0	1	3.75	19.06	0.732398
SA41.ATU14	200	200	0	T/T	99.0	795	chr22	29091839	29091840	T	snp	ts	0.0378787878788	61	5	0	0	0.749086566952	CHEK2	12	ENST00000382580	Aag/Gag	p.Lys416Glu/c.1246A>G	586	Pkinase	Pkinase	protein_coding	missense_variant		1		rs74751600	0		-1.0	0		-1.0	1	0.026		0.0254555283493	0		0	1	3.75	19.06	0.732398
Y115B.ATU14	97	93	4	T/T	99.0	795	chr22	29091839	29091840	T	snp	ts	0.0378787878788	61	5	0	0	0.749086566952	CHEK2	12	ENST00000382580	Aag/Gag	p.Lys416Glu/c.1246A>G	586	Pkinase	Pkinase	protein_coding	missense_variant		1		rs74751600	0		-1.0	0		-1.0	1	0.026		0.0254555283493	0		0	1	3.75	19.06	0.732398
Y123B.ATU14	192	187	5	T/T	99.0	795	chr22	29091839	29091840	T	snp	ts	0.0378787878788	61	5	0	0	0.749086566952	CHEK2	12	ENST00000382580	Aag/Gag	p.Lys416Glu/c.1246A>G	586	Pkinase	Pkinase	protein_coding	missense_variant		1		rs74751600	0		-1.0	0		-1.0	1	0.026		0.0254555283493	0		0	1	3.75	19.06	0.732398
Y135.ATU14	328	328	0	T/T	99.0	795	chr22	29091839	29091840	T	snp	ts	0.0378787878788	61	5	0	0	0.749086566952	CHEK2	12	ENST00000382580	Aag/Gag	p.Lys416Glu/c.1246A>G	586	Pkinase	Pkinase	protein_coding	missense_variant		1		rs74751600	0		-1.0	0		-1.0	1	0.026		0.0254555283493	0		0	1	3.75	19.06	0.732398
Y137B.ATU14	67	65	2	T/T	99.0	795	chr22	29091839	29091840	T	snp	ts	0.0378787878788	61	5	0	0	0.749086566952	CHEK2	12	ENST00000382580	Aag/Gag	p.Lys416Glu/c.1246A>G	586	Pkinase	Pkinase	protein_coding	missense_variant		1		rs74751600	0		-1.0	0		-1.0	1	0.026		0.0254555283493	0		0	1	3.75	19.06	0.732398
Y143C.ATU14	73	73	0	T/T	99.0	795	chr22	29091839	29091840	T	snp	ts	0.0378787878788	61	5	0	0	0.749086566952	CHEK2	12	ENST00000382580	Aag/Gag	p.Lys416Glu/c.1246A>G	586	Pkinase	Pkinase	protein_coding	missense_variant		1		rs74751600	0		-1.0	0		-1.0	1	0.026		0.0254555283493	0		0	1	3.75	19.06	0.732398
Y145B.ATU14	503	497	6	T/T	99.0	795	chr22	29091839	29091840	T	snp	ts	0.0378787878788	61	5	0	0	0.749086566952	CHEK2	12	ENST00000382580	Aag/Gag	p.Lys416Glu/c.1246A>G	586	Pkinase	Pkinase	protein_coding	missense_variant		1		rs74751600	0		-1.0	0		-1.0	1	0.026		0.0254555283493	0		0	1	3.75	19.06	0.732398
Y146B.A8P8B	108	106	2	T/T	99.0	795	chr22	29091839	29091840	T	snp	ts	0.0378787878788	61	5	0	0	0.749086566952	CHEK2	12	ENST00000382580	Aag/Gag	p.Lys416Glu/c.1246A>G	586	Pkinase	Pkinase	protein_coding	missense_variant		1		rs74751600	0		-1.0	0		-1.0	1	0.026		0.0254555283493	0		0	1	3.75	19.06	0.732398
Y151B.ATU14	48	48	0	T/T	99.0	795	chr22	29091839	29091840	T	snp	ts	0.0378787878788	61	5	0	0	0.749086566952	CHEK2	12	ENST00000382580	Aag/Gag	p.Lys416Glu/c.1246A>G	586	Pkinase	Pkinase	protein_coding	missense_variant		1		rs74751600	0		-1.0	0		-1.0	1	0.026		0.0254555283493	0		0	1	3.75	19.06	0.732398
Y159C.ATU14	125	123	2	T/T	99.0	795	chr22	29091839	29091840	T	snp	ts	0.0378787878788	61	5	0	0	0.749086566952	CHEK2	12	ENST00000382580	Aag/Gag	p.Lys416Glu/c.1246A>G	586	Pkinase	Pkinase	protein_coding	missense_variant		1		rs74751600	0		-1.0	0		-1.0	1	0.026		0.0254555283493	0		0	1	3.75	19.06	0.732398
Y161C.ATU14	43	41	2	T/T	79.0	795	chr22	29091839	29091840	T	snp	ts	0.0378787878788	61	5	0	0	0.749086566952	CHEK2	12	ENST00000382580	Aag/Gag	p.Lys416Glu/c.1246A>G	586	Pkinase	Pkinase	protein_coding	missense_variant		1		rs74751600	0		-1.0	0		-1.0	1	0.026		0.0254555283493	0		0	1	3.75	19.06	0.732398
Y165B.ATU14	130	124	6	T/T	99.0	795	chr22	29091839	29091840	T	snp	ts	0.0378787878788	61	5	0	0	0.749086566952	CHEK2	12	ENST00000382580	Aag/Gag	p.Lys416Glu/c.1246A>G	586	Pkinase	Pkinase	protein_coding	missense_variant		1		rs74751600	0		-1.0	0		-1.0	1	0.026		0.0254555283493	0		0	1	3.75	19.06	0.732398
Y167B.A8P8B	79	79	0	T/T	99.0	795	chr22	29091839	29091840	T	snp	ts	0.0378787878788	61	5	0	0	0.749086566952	CHEK2	12	ENST00000382580	Aag/Gag	p.Lys416Glu/c.1246A>G	586	Pkinase	Pkinase	protein_coding	missense_variant		1		rs74751600	0		-1.0	0		-1.0	1	0.026		0.0254555283493	0		0	1	3.75	19.06	0.732398
Y168C.A8P8B	20	19	1	T/T	39.0	795	chr22	29091839	29091840	T	snp	ts	0.0378787878788	61	5	0	0	0.749086566952	CHEK2	12	ENST00000382580	Aag/Gag	p.Lys416Glu/c.1246A>G	586	Pkinase	Pkinase	protein_coding	missense_variant		1		rs74751600	0		-1.0	0		-1.0	1	0.026		0.0254555283493	0		0	1	3.75	19.06	0.732398
Y169C.ATU14	67	60	7	T/T	25.0	795	chr22	29091839	29091840	T	snp	ts	0.0378787878788	61	5	0	0	0.749086566952	CHEK2	12	ENST00000382580	Aag/Gag	p.Lys416Glu/c.1246A>G	586	Pkinase	Pkinase	protein_coding	missense_variant		1		rs74751600	0		-1.0	0		-1.0	1	0.026		0.0254555283493	0		0	1	3.75	19.06	0.732398
ps4.AL9E5	153	149	4	T/T	99.0	795	chr22	29091839	29091840	T	snp	ts	0.0378787878788	61	5	0	0	0.749086566952	CHEK2	12	ENST00000382580	Aag/Gag	p.Lys416Glu/c.1246A>G	586	Pkinase	Pkinase	protein_coding	missense_variant		1		rs74751600	0		-1.0	0		-1.0	1	0.026		0.0254555283493	0		0	1	3.75	19.06	0.732398
ps6.AUMV1	61	59	2	T/T	99.0	795	chr22	29091839	29091840	T	snp	ts	0.0378787878788	61	5	0	0	0.749086566952	CHEK2	12	ENST00000382580	Aag/Gag	p.Lys416Glu/c.1246A>G	586	Pkinase	Pkinase	protein_coding	missense_variant		1		rs74751600	0		-1.0	0		-1.0	1	0.026		0.0254555283493	0		0	1	3.75	19.06	0.732398
sa14.AL9E5	285	279	6	T/T	99.0	795	chr22	29091839	29091840	T	snp	ts	0.0378787878788	61	5	0	0	0.749086566952	CHEK2	12	ENST00000382580	Aag/Gag	p.Lys416Glu/c.1246A>G	586	Pkinase	Pkinase	protein_coding	missense_variant		1		rs74751600	0		-1.0	0		-1.0	1	0.026		0.0254555283493	0		0	1	3.75	19.06	0.732398
sa39.AL9E5	135	135	0	T/T	99.0	795	chr22	29091839	29091840	T	snp	ts	0.0378787878788	61	5	0	0	0.749086566952	CHEK2	12	ENST00000382580	Aag/Gag	p.Lys416Glu/c.1246A>G	586	Pkinase	Pkinase	protein_coding	missense_variant		1		rs74751600	0		-1.0	0		-1.0	1	0.026		0.0254555283493	0		0	1	3.75	19.06	0.732398
sa40.ATR2U	116	114	2	T/T	99.0	795	chr22	29091839	29091840	T	snp	ts	0.0378787878788	61	5	0	0	0.749086566952	CHEK2	12	ENST00000382580	Aag/Gag	p.Lys416Glu/c.1246A>G	586	Pkinase	Pkinase	protein_coding	missense_variant		1		rs74751600	0		-1.0	0		-1.0	1	0.026		0.0254555283493	0		0	1	3.75	19.06	0.732398
y103.AUMV1	296	286	10	T/T	99.0	795	chr22	29091839	29091840	T	snp	ts	0.0378787878788	61	5	0	0	0.749086566952	CHEK2	12	ENST00000382580	Aag/Gag	p.Lys416Glu/c.1246A>G	586	Pkinase	Pkinase	protein_coding	missense_variant		1		rs74751600	0		-1.0	0		-1.0	1	0.026		0.0254555283493	0		0	1	3.75	19.06	0.732398
y104.ATR2U	63	57	6	T/T	40.0	795	chr22	29091839	29091840	T	snp	ts	0.0378787878788	61	5	0	0	0.749086566952	CHEK2	12	ENST00000382580	Aag/Gag	p.Lys416Glu/c.1246A>G	586	Pkinase	Pkinase	protein_coding	missense_variant		1		rs74751600	0		-1.0	0		-1.0	1	0.026		0.0254555283493	0		0	1	3.75	19.06	0.732398
y109b.AUMV1	22	22	0	T/T	60.0	795	chr22	29091839	29091840	T	snp	ts	0.0378787878788	61	5	0	0	0.749086566952	CHEK2	12	ENST00000382580	Aag/Gag	p.Lys416Glu/c.1246A>G	586	Pkinase	Pkinase	protein_coding	missense_variant		1		rs74751600	0		-1.0	0		-1.0	1	0.026		0.0254555283493	0		0	1	3.75	19.06	0.732398
y110b.AUMV1	51	51	0	T/T	99.0	795	chr22	29091839	29091840	T	snp	ts	0.0378787878788	61	5	0	0	0.749086566952	CHEK2	12	ENST00000382580	Aag/Gag	p.Lys416Glu/c.1246A>G	586	Pkinase	Pkinase	protein_coding	missense_variant		1		rs74751600	0		-1.0	0		-1.0	1	0.026		0.0254555283493	0		0	1	3.75	19.06	0.732398
y128b.AUMV1	222	217	5	T/T	99.0	795	chr22	29091839	29091840	T	snp	ts	0.0378787878788	61	5	0	0	0.749086566952	CHEK2	12	ENST00000382580	Aag/Gag	p.Lys416Glu/c.1246A>G	586	Pkinase	Pkinase	protein_coding	missense_variant		1		rs74751600	0		-1.0	0		-1.0	1	0.026		0.0254555283493	0		0	1	3.75	19.06	0.732398
y132b.AUMV1	27	27	0	T/T	69.0	795	chr22	29091839	29091840	T	snp	ts	0.0378787878788	61	5	0	0	0.749086566952	CHEK2	12	ENST00000382580	Aag/Gag	p.Lys416Glu/c.1246A>G	586	Pkinase	Pkinase	protein_coding	missense_variant		1		rs74751600	0		-1.0	0		-1.0	1	0.026		0.0254555283493	0		0	1	3.75	19.06	0.732398
y134b.AL9E5	233	233	0	T/T	99.0	795	chr22	29091839	29091840	T	snp	ts	0.0378787878788	61	5	0	0	0.749086566952	CHEK2	12	ENST00000382580	Aag/Gag	p.Lys416Glu/c.1246A>G	586	Pkinase	Pkinase	protein_coding	missense_variant		1		rs74751600	0		-1.0	0		-1.0	1	0.026		0.0254555283493	0		0	1	3.75	19.06	0.732398
y144c.AUMV1	158	155	3	T/T	99.0	795	chr22	29091839	29091840	T	snp	ts	0.0378787878788	61	5	0	0	0.749086566952	CHEK2	12	ENST00000382580	Aag/Gag	p.Lys416Glu/c.1246A>G	586	Pkinase	Pkinase	protein_coding	missense_variant		1		rs74751600	0		-1.0	0		-1.0	1	0.026		0.0254555283493	0		0	1	3.75	19.06	0.732398
y147c.AUMV1	299	293	6	T/T	99.0	795	chr22	29091839	29091840	T	snp	ts	0.0378787878788	61	5	0	0	0.749086566952	CHEK2	12	ENST00000382580	Aag/Gag	p.Lys416Glu/c.1246A>G	586	Pkinase	Pkinase	protein_coding	missense_variant		1		rs74751600	0		-1.0	0		-1.0	1	0.026		0.0254555283493	0		0	1	3.75	19.06	0.732398
y162c.ATR2U	76	76	0	T/T	99.0	795	chr22	29091839	29091840	T	snp	ts	0.0378787878788	61	5	0	0	0.749086566952	CHEK2	12	ENST00000382580	Aag/Gag	p.Lys416Glu/c.1246A>G	586	Pkinase	Pkinase	protein_coding	missense_variant		1		rs74751600	0		-1.0	0		-1.0	1	0.026		0.0254555283493	0		0	1	3.75	19.06	0.732398
y179f.AL9E5	355	346	9	T/T	99.0	795	chr22	29091839	29091840	T	snp	ts	0.0378787878788	61	5	0	0	0.749086566952	CHEK2	12	ENST00000382580	Aag/Gag	p.Lys416Glu/c.1246A>G	586	Pkinase	Pkinase	protein_coding	missense_variant		1		rs74751600	0		-1.0	0		-1.0	1	0.026		0.0254555283493	0		0	1	3.75	19.06	0.732398
y183b.AUMV1	116	116	0	T/T	99.0	795	chr22	29091839	29091840	T	snp	ts	0.0378787878788	61	5	0	0	0.749086566952	CHEK2	12	ENST00000382580	Aag/Gag	p.Lys416Glu/c.1246A>G	586	Pkinase	Pkinase	protein_coding	missense_variant		1		rs74751600	0		-1.0	0		-1.0	1	0.026		0.0254555283493	0		0	1	3.75	19.06	0.732398
y199b.AL9E5	334	307	27	T/T	99.0	795	chr22	29091839	29091840	T	snp	ts	0.0378787878788	61	5	0	0	0.749086566952	CHEK2	12	ENST00000382580	Aag/Gag	p.Lys416Glu/c.1246A>G	586	Pkinase	Pkinase	protein_coding	missense_variant		1		rs74751600	0		-1.0	0		-1.0	1	0.026		0.0254555283493	0		0	1	3.75	19.06	0.732398
y68.ATR2U	156	144	12	T/T	99.0	795	chr22	29091839	29091840	T	snp	ts	0.0378787878788	61	5	0	0	0.749086566952	CHEK2	12	ENST00000382580	Aag/Gag	p.Lys416Glu/c.1246A>G	586	Pkinase	Pkinase	protein_coding	missense_variant		1		rs74751600	0		-1.0	0		-1.0	1	0.026		0.0254555283493	0		0	1	3.75	19.06	0.732398
y77.AL9E5	184	177	7	T/T	99.0	795	chr22	29091839	29091840	T	snp	ts	0.0378787878788	61	5	0	0	0.749086566952	CHEK2	12	ENST00000382580	Aag/Gag	p.Lys416Glu/c.1246A>G	586	Pkinase	Pkinase	protein_coding	missense_variant		1		rs74751600	0		-1.0	0		-1.0	1	0.026		0.0254555283493	0		0	1	3.75	19.06	0.732398
y88.AUMV1	24	24	0	T/T	60.0	795	chr22	29091839	29091840	T	snp	ts	0.0378787878788	61	5	0	0	0.749086566952	CHEK2	12	ENST00000382580	Aag/Gag	p.Lys416Glu/c.1246A>G	586	Pkinase	Pkinase	protein_coding	missense_variant		1		rs74751600	0		-1.0	0		-1.0	1	0.026		0.0254555283493	0		0	1	3.75	19.06	0.732398
17.AUMV1	139	120	19	T/C	99.0	795	chr22	29091839	29091840	T	snp	ts	0.0378787878788	61	5	0	0	0.749086566952	CHEK2	12	ENST00000382580	Aag/Gag	p.Lys416Glu/c.1246A>G	586	Pkinase	Pkinase	protein_coding	missense_variant		1		rs74751600	0		-1.0	0		-1.0	1	0.026		0.0254555283493	0		0	1	3.75	19.06	0.732398
26.ATU14	150	133	17	T/C	99.0	795	chr22	29091839	29091840	T	snp	ts	0.0378787878788	61	5	0	0	0.749086566952	CHEK2	12	ENST00000382580	Aag/Gag	p.Lys416Glu/c.1246A>G	586	Pkinase	Pkinase	protein_coding	missense_variant		1		rs74751600	0		-1.0	0		-1.0	1	0.026		0.0254555283493	0		0	1	3.75	19.06	0.732398
45.ATU14	119	107	12	T/C	99.0	795	chr22	29091839	29091840	T	snp	ts	0.0378787878788	61	5	0	0	0.749086566952	CHEK2	12	ENST00000382580	Aag/Gag	p.Lys416Glu/c.1246A>G	586	Pkinase	Pkinase	protein_coding	missense_variant		1		rs74751600	0		-1.0	0		-1.0	1	0.026		0.0254555283493	0		0	1	3.75	19.06	0.732398
y188b.AUMV1	115	101	14	T/C	99.0	795	chr22	29091839	29091840	T	snp	ts	0.0378787878788	61	5	0	0	0.749086566952	CHEK2	12	ENST00000382580	Aag/Gag	p.Lys416Glu/c.1246A>G	586	Pkinase	Pkinase	protein_coding	missense_variant		1		rs74751600	0		-1.0	0		-1.0	1	0.026		0.0254555283493	0		0	1	3.75	19.06	0.732398
y3.AUMV1	51	39	12	T/C	99.0	795	chr22	29091839	29091840	T	snp	ts	0.0378787878788	61	5	0	0	0.749086566952	CHEK2	12	ENST00000382580	Aag/Gag	p.Lys416Glu/c.1246A>G	586	Pkinase	Pkinase	protein_coding	missense_variant		1		rs74751600	0		-1.0	0		-1.0	1	0.026		0.0254555283493	0		0	1	3.75	19.06	0.732398
1.ATR2U	139	129	10	G/G	99.0	796	chr22	29091840	29091841	G	snp	ts	0.0378787878788	61	5	0	0	0.749086566952	CHEK2	12	ENST00000382580	tcC/tcT	p.Ser415Ser/c.1245C>T	586	Pkinase	Pkinase	protein_coding	synonymous_variant		1		rs146546850	0		-1.0	0		-1.0	1	0.026		0.0252025344387	0		0	1	0.33	5.79	0.732398
10.ATU14	106	102	4	G/G	99.0	796	chr22	29091840	29091841	G	snp	ts	0.0378787878788	61	5	0	0	0.749086566952	CHEK2	12	ENST00000382580	tcC/tcT	p.Ser415Ser/c.1245C>T	586	Pkinase	Pkinase	protein_coding	synonymous_variant		1		rs146546850	0		-1.0	0		-1.0	1	0.026		0.0252025344387	0		0	1	0.33	5.79	0.732398
2.ATR2U	306	298	8	G/G	99.0	796	chr22	29091840	29091841	G	snp	ts	0.0378787878788	61	5	0	0	0.749086566952	CHEK2	12	ENST00000382580	tcC/tcT	p.Ser415Ser/c.1245C>T	586	Pkinase	Pkinase	protein_coding	synonymous_variant		1		rs146546850	0		-1.0	0		-1.0	1	0.026		0.0252025344387	0		0	1	0.33	5.79	0.732398
21.AL9E5	74	73	1	G/G	99.0	796	chr22	29091840	29091841	G	snp	ts	0.0378787878788	61	5	0	0	0.749086566952	CHEK2	12	ENST00000382580	tcC/tcT	p.Ser415Ser/c.1245C>T	586	Pkinase	Pkinase	protein_coding	synonymous_variant		1		rs146546850	0		-1.0	0		-1.0	1	0.026		0.0252025344387	0		0	1	0.33	5.79	0.732398
22.AUMV1	215	207	8	G/G	99.0	796	chr22	29091840	29091841	G	snp	ts	0.0378787878788	61	5	0	0	0.749086566952	CHEK2	12	ENST00000382580	tcC/tcT	p.Ser415Ser/c.1245C>T	586	Pkinase	Pkinase	protein_coding	synonymous_variant		1		rs146546850	0		-1.0	0		-1.0	1	0.026		0.0252025344387	0		0	1	0.33	5.79	0.732398
31.ATU14	227	221	6	G/G	99.0	796	chr22	29091840	29091841	G	snp	ts	0.0378787878788	61	5	0	0	0.749086566952	CHEK2	12	ENST00000382580	tcC/tcT	p.Ser415Ser/c.1245C>T	586	Pkinase	Pkinase	protein_coding	synonymous_variant		1		rs146546850	0		-1.0	0		-1.0	1	0.026		0.0252025344387	0		0	1	0.33	5.79	0.732398
35.ATU14	57	53	4	G/G	72.0	796	chr22	29091840	29091841	G	snp	ts	0.0378787878788	61	5	0	0	0.749086566952	CHEK2	12	ENST00000382580	tcC/tcT	p.Ser415Ser/c.1245C>T	586	Pkinase	Pkinase	protein_coding	synonymous_variant		1		rs146546850	0		-1.0	0		-1.0	1	0.026		0.0252025344387	0		0	1	0.33	5.79	0.732398
37.ATU14	55	53	2	G/G	99.0	796	chr22	29091840	29091841	G	snp	ts	0.0378787878788	61	5	0	0	0.749086566952	CHEK2	12	ENST00000382580	tcC/tcT	p.Ser415Ser/c.1245C>T	586	Pkinase	Pkinase	protein_coding	synonymous_variant		1		rs146546850	0		-1.0	0		-1.0	1	0.026		0.0252025344387	0		0	1	0.33	5.79	0.732398
5.ATR2U	324	324	0	G/G	99.0	796	chr22	29091840	29091841	G	snp	ts	0.0378787878788	61	5	0	0	0.749086566952	CHEK2	12	ENST00000382580	tcC/tcT	p.Ser415Ser/c.1245C>T	586	Pkinase	Pkinase	protein_coding	synonymous_variant		1		rs146546850	0		-1.0	0		-1.0	1	0.026		0.0252025344387	0		0	1	0.33	5.79	0.732398
63n.AUMV1	229	228	1	G/G	99.0	796	chr22	29091840	29091841	G	snp	ts	0.0378787878788	61	5	0	0	0.749086566952	CHEK2	12	ENST00000382580	tcC/tcT	p.Ser415Ser/c.1245C>T	586	Pkinase	Pkinase	protein_coding	synonymous_variant		1		rs146546850	0		-1.0	0		-1.0	1	0.026		0.0252025344387	0		0	1	0.33	5.79	0.732398
7.A8P8B	220	203	17	G/G	99.0	796	chr22	29091840	29091841	G	snp	ts	0.0378787878788	61	5	0	0	0.749086566952	CHEK2	12	ENST00000382580	tcC/tcT	p.Ser415Ser/c.1245C>T	586	Pkinase	Pkinase	protein_coding	synonymous_variant		1		rs146546850	0		-1.0	0		-1.0	1	0.026		0.0252025344387	0		0	1	0.33	5.79	0.732398
72.ATR2U	513	484	29	G/G	99.0	796	chr22	29091840	29091841	G	snp	ts	0.0378787878788	61	5	0	0	0.749086566952	CHEK2	12	ENST00000382580	tcC/tcT	p.Ser415Ser/c.1245C>T	586	Pkinase	Pkinase	protein_coding	synonymous_variant		1		rs146546850	0		-1.0	0		-1.0	1	0.026		0.0252025344387	0		0	1	0.33	5.79	0.732398
82.ATR2U	329	328	1	G/G	99.0	796	chr22	29091840	29091841	G	snp	ts	0.0378787878788	61	5	0	0	0.749086566952	CHEK2	12	ENST00000382580	tcC/tcT	p.Ser415Ser/c.1245C>T	586	Pkinase	Pkinase	protein_coding	synonymous_variant		1		rs146546850	0		-1.0	0		-1.0	1	0.026		0.0252025344387	0		0	1	0.33	5.79	0.732398
84.ATR2U	537	537	0	G/G	99.0	796	chr22	29091840	29091841	G	snp	ts	0.0378787878788	61	5	0	0	0.749086566952	CHEK2	12	ENST00000382580	tcC/tcT	p.Ser415Ser/c.1245C>T	586	Pkinase	Pkinase	protein_coding	synonymous_variant		1		rs146546850	0		-1.0	0		-1.0	1	0.026		0.0252025344387	0		0	1	0.33	5.79	0.732398
91n.AUMV1	140	140	0	G/G	99.0	796	chr22	29091840	29091841	G	snp	ts	0.0378787878788	61	5	0	0	0.749086566952	CHEK2	12	ENST00000382580	tcC/tcT	p.Ser415Ser/c.1245C>T	586	Pkinase	Pkinase	protein_coding	synonymous_variant		1		rs146546850	0		-1.0	0		-1.0	1	0.026		0.0252025344387	0		0	1	0.33	5.79	0.732398
BS2.ATU14	26	25	1	G/G	62.0	796	chr22	29091840	29091841	G	snp	ts	0.0378787878788	61	5	0	0	0.749086566952	CHEK2	12	ENST00000382580	tcC/tcT	p.Ser415Ser/c.1245C>T	586	Pkinase	Pkinase	protein_coding	synonymous_variant		1		rs146546850	0		-1.0	0		-1.0	1	0.026		0.0252025344387	0		0	1	0.33	5.79	0.732398
PS1.A8P8B	207	203	4	G/G	99.0	796	chr22	29091840	29091841	G	snp	ts	0.0378787878788	61	5	0	0	0.749086566952	CHEK2	12	ENST00000382580	tcC/tcT	p.Ser415Ser/c.1245C>T	586	Pkinase	Pkinase	protein_coding	synonymous_variant		1		rs146546850	0		-1.0	0		-1.0	1	0.026		0.0252025344387	0		0	1	0.33	5.79	0.732398
PS2.A8P8B	183	176	7	G/G	99.0	796	chr22	29091840	29091841	G	snp	ts	0.0378787878788	61	5	0	0	0.749086566952	CHEK2	12	ENST00000382580	tcC/tcT	p.Ser415Ser/c.1245C>T	586	Pkinase	Pkinase	protein_coding	synonymous_variant		1		rs146546850	0		-1.0	0		-1.0	1	0.026		0.0252025344387	0		0	1	0.33	5.79	0.732398
SA23.ATU14	65	61	4	G/G	96.0	796	chr22	29091840	29091841	G	snp	ts	0.0378787878788	61	5	0	0	0.749086566952	CHEK2	12	ENST00000382580	tcC/tcT	p.Ser415Ser/c.1245C>T	586	Pkinase	Pkinase	protein_coding	synonymous_variant		1		rs146546850	0		-1.0	0		-1.0	1	0.026		0.0252025344387	0		0	1	0.33	5.79	0.732398
SA36.A8P8B	73	71	2	G/G	99.0	796	chr22	29091840	29091841	G	snp	ts	0.0378787878788	61	5	0	0	0.749086566952	CHEK2	12	ENST00000382580	tcC/tcT	p.Ser415Ser/c.1245C>T	586	Pkinase	Pkinase	protein_coding	synonymous_variant		1		rs146546850	0		-1.0	0		-1.0	1	0.026		0.0252025344387	0		0	1	0.33	5.79	0.732398
SA38.ATU14	25	25	0	G/G	75.0	796	chr22	29091840	29091841	G	snp	ts	0.0378787878788	61	5	0	0	0.749086566952	CHEK2	12	ENST00000382580	tcC/tcT	p.Ser415Ser/c.1245C>T	586	Pkinase	Pkinase	protein_coding	synonymous_variant		1		rs146546850	0		-1.0	0		-1.0	1	0.026		0.0252025344387	0		0	1	0.33	5.79	0.732398
SA41.ATU14	200	200	0	G/G	99.0	796	chr22	29091840	29091841	G	snp	ts	0.0378787878788	61	5	0	0	0.749086566952	CHEK2	12	ENST00000382580	tcC/tcT	p.Ser415Ser/c.1245C>T	586	Pkinase	Pkinase	protein_coding	synonymous_variant		1		rs146546850	0		-1.0	0		-1.0	1	0.026		0.0252025344387	0		0	1	0.33	5.79	0.732398
Y115B.ATU14	97	93	4	G/G	99.0	796	chr22	29091840	29091841	G	snp	ts	0.0378787878788	61	5	0	0	0.749086566952	CHEK2	12	ENST00000382580	tcC/tcT	p.Ser415Ser/c.1245C>T	586	Pkinase	Pkinase	protein_coding	synonymous_variant		1		rs146546850	0		-1.0	0		-1.0	1	0.026		0.0252025344387	0		0	1	0.33	5.79	0.732398
Y123B.ATU14	191	186	5	G/G	99.0	796	chr22	29091840	29091841	G	snp	ts	0.0378787878788	61	5	0	0	0.749086566952	CHEK2	12	ENST00000382580	tcC/tcT	p.Ser415Ser/c.1245C>T	586	Pkinase	Pkinase	protein_coding	synonymous_variant		1		rs146546850	0		-1.0	0		-1.0	1	0.026		0.0252025344387	0		0	1	0.33	5.79	0.732398
Y135.ATU14	330	330	0	G/G	99.0	796	chr22	29091840	29091841	G	snp	ts	0.0378787878788	61	5	0	0	0.749086566952	CHEK2	12	ENST00000382580	tcC/tcT	p.Ser415Ser/c.1245C>T	586	Pkinase	Pkinase	protein_coding	synonymous_variant		1		rs146546850	0		-1.0	0		-1.0	1	0.026		0.0252025344387	0		0	1	0.33	5.79	0.732398
Y137B.ATU14	67	65	2	G/G	99.0	796	chr22	29091840	29091841	G	snp	ts	0.0378787878788	61	5	0	0	0.749086566952	CHEK2	12	ENST00000382580	tcC/tcT	p.Ser415Ser/c.1245C>T	586	Pkinase	Pkinase	protein_coding	synonymous_variant		1		rs146546850	0		-1.0	0		-1.0	1	0.026		0.0252025344387	0		0	1	0.33	5.79	0.732398
Y143C.ATU14	73	73	0	G/G	99.0	796	chr22	29091840	29091841	G	snp	ts	0.0378787878788	61	5	0	0	0.749086566952	CHEK2	12	ENST00000382580	tcC/tcT	p.Ser415Ser/c.1245C>T	586	Pkinase	Pkinase	protein_coding	synonymous_variant		1		rs146546850	0		-1.0	0		-1.0	1	0.026		0.0252025344387	0		0	1	0.33	5.79	0.732398
Y145B.ATU14	502	493	9	G/G	99.0	796	chr22	29091840	29091841	G	snp	ts	0.0378787878788	61	5	0	0	0.749086566952	CHEK2	12	ENST00000382580	tcC/tcT	p.Ser415Ser/c.1245C>T	586	Pkinase	Pkinase	protein_coding	synonymous_variant		1		rs146546850	0		-1.0	0		-1.0	1	0.026		0.0252025344387	0		0	1	0.33	5.79	0.732398
Y146B.A8P8B	110	108	2	G/G	99.0	796	chr22	29091840	29091841	G	snp	ts	0.0378787878788	61	5	0	0	0.749086566952	CHEK2	12	ENST00000382580	tcC/tcT	p.Ser415Ser/c.1245C>T	586	Pkinase	Pkinase	protein_coding	synonymous_variant		1		rs146546850	0		-1.0	0		-1.0	1	0.026		0.0252025344387	0		0	1	0.33	5.79	0.732398
Y151B.ATU14	48	48	0	G/G	99.0	796	chr22	29091840	29091841	G	snp	ts	0.0378787878788	61	5	0	0	0.749086566952	CHEK2	12	ENST00000382580	tcC/tcT	p.Ser415Ser/c.1245C>T	586	Pkinase	Pkinase	protein_coding	synonymous_variant		1		rs146546850	0		-1.0	0		-1.0	1	0.026		0.0252025344387	0		0	1	0.33	5.79	0.732398
Y159C.ATU14	123	119	4	G/G	99.0	796	chr22	29091840	29091841	G	snp	ts	0.0378787878788	61	5	0	0	0.749086566952	CHEK2	12	ENST00000382580	tcC/tcT	p.Ser415Ser/c.1245C>T	586	Pkinase	Pkinase	protein_coding	synonymous_variant		1		rs146546850	0		-1.0	0		-1.0	1	0.026		0.0252025344387	0		0	1	0.33	5.79	0.732398
Y161C.ATU14	43	41	2	G/G	79.0	796	chr22	29091840	29091841	G	snp	ts	0.0378787878788	61	5	0	0	0.749086566952	CHEK2	12	ENST00000382580	tcC/tcT	p.Ser415Ser/c.1245C>T	586	Pkinase	Pkinase	protein_coding	synonymous_variant		1		rs146546850	0		-1.0	0		-1.0	1	0.026		0.0252025344387	0		0	1	0.33	5.79	0.732398
Y165B.ATU14	129	123	6	G/G	99.0	796	chr22	29091840	29091841	G	snp	ts	0.0378787878788	61	5	0	0	0.749086566952	CHEK2	12	ENST00000382580	tcC/tcT	p.Ser415Ser/c.1245C>T	586	Pkinase	Pkinase	protein_coding	synonymous_variant		1		rs146546850	0		-1.0	0		-1.0	1	0.026		0.0252025344387	0		0	1	0.33	5.79	0.732398
Y167B.A8P8B	79	79	0	G/G	99.0	796	chr22	29091840	29091841	G	snp	ts	0.0378787878788	61	5	0	0	0.749086566952	CHEK2	12	ENST00000382580	tcC/tcT	p.Ser415Ser/c.1245C>T	586	Pkinase	Pkinase	protein_coding	synonymous_variant		1		rs146546850	0		-1.0	0		-1.0	1	0.026		0.0252025344387	0		0	1	0.33	5.79	0.732398
Y168C.A8P8B	19	19	0	G/G	51.0	796	chr22	29091840	29091841	G	snp	ts	0.0378787878788	61	5	0	0	0.749086566952	CHEK2	12	ENST00000382580	tcC/tcT	p.Ser415Ser/c.1245C>T	586	Pkinase	Pkinase	protein_coding	synonymous_variant		1		rs146546850	0		-1.0	0		-1.0	1	0.026		0.0252025344387	0		0	1	0.33	5.79	0.732398
Y169C.ATU14	71	65	6	G/G	64.0	796	chr22	29091840	29091841	G	snp	ts	0.0378787878788	61	5	0	0	0.749086566952	CHEK2	12	ENST00000382580	tcC/tcT	p.Ser415Ser/c.1245C>T	586	Pkinase	Pkinase	protein_coding	synonymous_variant		1		rs146546850	0		-1.0	0		-1.0	1	0.026		0.0252025344387	0		0	1	0.33	5.79	0.732398
ps4.AL9E5	151	147	4	G/G	99.0	796	chr22	29091840	29091841	G	snp	ts	0.0378787878788	61	5	0	0	0.749086566952	CHEK2	12	ENST00000382580	tcC/tcT	p.Ser415Ser/c.1245C>T	586	Pkinase	Pkinase	protein_coding	synonymous_variant		1		rs146546850	0		-1.0	0		-1.0	1	0.026		0.0252025344387	0		0	1	0.33	5.79	0.732398
ps6.AUMV1	61	58	3	G/G	99.0	796	chr22	29091840	29091841	G	snp	ts	0.0378787878788	61	5	0	0	0.749086566952	CHEK2	12	ENST00000382580	tcC/tcT	p.Ser415Ser/c.1245C>T	586	Pkinase	Pkinase	protein_coding	synonymous_variant		1		rs146546850	0		-1.0	0		-1.0	1	0.026		0.0252025344387	0		0	1	0.33	5.79	0.732398
sa14.AL9E5	285	279	6	G/G	99.0	796	chr22	29091840	29091841	G	snp	ts	0.0378787878788	61	5	0	0	0.749086566952	CHEK2	12	ENST00000382580	tcC/tcT	p.Ser415Ser/c.1245C>T	586	Pkinase	Pkinase	protein_coding	synonymous_variant		1		rs146546850	0		-1.0	0		-1.0	1	0.026		0.0252025344387	0		0	1	0.33	5.79	0.732398
sa39.AL9E5	133	133	0	G/G	99.0	796	chr22	29091840	29091841	G	snp	ts	0.0378787878788	61	5	0	0	0.749086566952	CHEK2	12	ENST00000382580	tcC/tcT	p.Ser415Ser/c.1245C>T	586	Pkinase	Pkinase	protein_coding	synonymous_variant		1		rs146546850	0		-1.0	0		-1.0	1	0.026		0.0252025344387	0		0	1	0.33	5.79	0.732398
sa40.ATR2U	116	114	2	G/G	99.0	796	chr22	29091840	29091841	G	snp	ts	0.0378787878788	61	5	0	0	0.749086566952	CHEK2	12	ENST00000382580	tcC/tcT	p.Ser415Ser/c.1245C>T	586	Pkinase	Pkinase	protein_coding	synonymous_variant		1		rs146546850	0		-1.0	0		-1.0	1	0.026		0.0252025344387	0		0	1	0.33	5.79	0.732398
y103.AUMV1	296	286	10	G/G	99.0	796	chr22	29091840	29091841	G	snp	ts	0.0378787878788	61	5	0	0	0.749086566952	CHEK2	12	ENST00000382580	tcC/tcT	p.Ser415Ser/c.1245C>T	586	Pkinase	Pkinase	protein_coding	synonymous_variant		1		rs146546850	0		-1.0	0		-1.0	1	0.026		0.0252025344387	0		0	1	0.33	5.79	0.732398
y104.ATR2U	63	57	6	G/G	40.0	796	chr22	29091840	29091841	G	snp	ts	0.0378787878788	61	5	0	0	0.749086566952	CHEK2	12	ENST00000382580	tcC/tcT	p.Ser415Ser/c.1245C>T	586	Pkinase	Pkinase	protein_coding	synonymous_variant		1		rs146546850	0		-1.0	0		-1.0	1	0.026		0.0252025344387	0		0	1	0.33	5.79	0.732398
y109b.AUMV1	22	22	0	G/G	60.0	796	chr22	29091840	29091841	G	snp	ts	0.0378787878788	61	5	0	0	0.749086566952	CHEK2	12	ENST00000382580	tcC/tcT	p.Ser415Ser/c.1245C>T	586	Pkinase	Pkinase	protein_coding	synonymous_variant		1		rs146546850	0		-1.0	0		-1.0	1	0.026		0.0252025344387	0		0	1	0.33	5.79	0.732398
y110b.AUMV1	49	49	0	G/G	99.0	796	chr22	29091840	29091841	G	snp	ts	0.0378787878788	61	5	0	0	0.749086566952	CHEK2	12	ENST00000382580	tcC/tcT	p.Ser415Ser/c.1245C>T	586	Pkinase	Pkinase	protein_coding	synonymous_variant		1		rs146546850	0		-1.0	0		-1.0	1	0.026		0.0252025344387	0		0	1	0.33	5.79	0.732398
y128b.AUMV1	224	219	5	G/G	99.0	796	chr22	29091840	29091841	G	snp	ts	0.0378787878788	61	5	0	0	0.749086566952	CHEK2	12	ENST00000382580	tcC/tcT	p.Ser415Ser/c.1245C>T	586	Pkinase	Pkinase	protein_coding	synonymous_variant		1		rs146546850	0		-1.0	0		-1.0	1	0.026		0.0252025344387	0		0	1	0.33	5.79	0.732398
y132b.AUMV1	27	27	0	G/G	69.0	796	chr22	29091840	29091841	G	snp	ts	0.0378787878788	61	5	0	0	0.749086566952	CHEK2	12	ENST00000382580	tcC/tcT	p.Ser415Ser/c.1245C>T	586	Pkinase	Pkinase	protein_coding	synonymous_variant		1		rs146546850	0		-1.0	0		-1.0	1	0.026		0.0252025344387	0		0	1	0.33	5.79	0.732398
y134b.AL9E5	231	231	0	G/G	99.0	796	chr22	29091840	29091841	G	snp	ts	0.0378787878788	61	5	0	0	0.749086566952	CHEK2	12	ENST00000382580	tcC/tcT	p.Ser415Ser/c.1245C>T	586	Pkinase	Pkinase	protein_coding	synonymous_variant		1		rs146546850	0		-1.0	0		-1.0	1	0.026		0.0252025344387	0		0	1	0.33	5.79	0.732398
y144c.AUMV1	155	152	3	G/G	99.0	796	chr22	29091840	29091841	G	snp	ts	0.0378787878788	61	5	0	0	0.749086566952	CHEK2	12	ENST00000382580	tcC/tcT	p.Ser415Ser/c.1245C>T	586	Pkinase	Pkinase	protein_coding	synonymous_variant		1		rs146546850	0		-1.0	0		-1.0	1	0.026		0.0252025344387	0		0	1	0.33	5.79	0.732398
y147c.AUMV1	296	290	6	G/G	99.0	796	chr22	29091840	29091841	G	snp	ts	0.0378787878788	61	5	0	0	0.749086566952	CHEK2	12	ENST00000382580	tcC/tcT	p.Ser415Ser/c.1245C>T	586	Pkinase	Pkinase	protein_coding	synonymous_variant		1		rs146546850	0		-1.0	0		-1.0	1	0.026		0.0252025344387	0		0	1	0.33	5.79	0.732398
y162c.ATR2U	74	74	0	G/G	99.0	796	chr22	29091840	29091841	G	snp	ts	0.0378787878788	61	5	0	0	0.749086566952	CHEK2	12	ENST00000382580	tcC/tcT	p.Ser415Ser/c.1245C>T	586	Pkinase	Pkinase	protein_coding	synonymous_variant		1		rs146546850	0		-1.0	0		-1.0	1	0.026		0.0252025344387	0		0	1	0.33	5.79	0.732398
y179f.AL9E5	358	351	7	G/G	99.0	796	chr22	29091840	29091841	G	snp	ts	0.0378787878788	61	5	0	0	0.749086566952	CHEK2	12	ENST00000382580	tcC/tcT	p.Ser415Ser/c.1245C>T	586	Pkinase	Pkinase	protein_coding	synonymous_variant		1		rs146546850	0		-1.0	0		-1.0	1	0.026		0.0252025344387	0		0	1	0.33	5.79	0.732398
y183b.AUMV1	116	116	0	G/G	99.0	796	chr22	29091840	29091841	G	snp	ts	0.0378787878788	61	5	0	0	0.749086566952	CHEK2	12	ENST00000382580	tcC/tcT	p.Ser415Ser/c.1245C>T	586	Pkinase	Pkinase	protein_coding	synonymous_variant		1		rs146546850	0		-1.0	0		-1.0	1	0.026		0.0252025344387	0		0	1	0.33	5.79	0.732398
y199b.AL9E5	332	304	28	G/G	99.0	796	chr22	29091840	29091841	G	snp	ts	0.0378787878788	61	5	0	0	0.749086566952	CHEK2	12	ENST00000382580	tcC/tcT	p.Ser415Ser/c.1245C>T	586	Pkinase	Pkinase	protein_coding	synonymous_variant		1		rs146546850	0		-1.0	0		-1.0	1	0.026		0.0252025344387	0		0	1	0.33	5.79	0.732398
y68.ATR2U	156	144	12	G/G	99.0	796	chr22	29091840	29091841	G	snp	ts	0.0378787878788	61	5	0	0	0.749086566952	CHEK2	12	ENST00000382580	tcC/tcT	p.Ser415Ser/c.1245C>T	586	Pkinase	Pkinase	protein_coding	synonymous_variant		1		rs146546850	0		-1.0	0		-1.0	1	0.026		0.0252025344387	0		0	1	0.33	5.79	0.732398
y77.AL9E5	185	179	6	G/G	99.0	796	chr22	29091840	29091841	G	snp	ts	0.0378787878788	61	5	0	0	0.749086566952	CHEK2	12	ENST00000382580	tcC/tcT	p.Ser415Ser/c.1245C>T	586	Pkinase	Pkinase	protein_coding	synonymous_variant		1		rs146546850	0		-1.0	0		-1.0	1	0.026		0.0252025344387	0		0	1	0.33	5.79	0.732398
y88.AUMV1	24	24	0	G/G	60.0	796	chr22	29091840	29091841	G	snp	ts	0.0378787878788	61	5	0	0	0.749086566952	CHEK2	12	ENST00000382580	tcC/tcT	p.Ser415Ser/c.1245C>T	586	Pkinase	Pkinase	protein_coding	synonymous_variant		1		rs146546850	0		-1.0	0		-1.0	1	0.026		0.0252025344387	0		0	1	0.33	5.79	0.732398
17.AUMV1	137	118	19	G/A	99.0	796	chr22	29091840	29091841	G	snp	ts	0.0378787878788	61	5	0	0	0.749086566952	CHEK2	12	ENST00000382580	tcC/tcT	p.Ser415Ser/c.1245C>T	586	Pkinase	Pkinase	protein_coding	synonymous_variant		1		rs146546850	0		-1.0	0		-1.0	1	0.026		0.0252025344387	0		0	1	0.33	5.79	0.732398
26.ATU14	150	133	17	G/A	99.0	796	chr22	29091840	29091841	G	snp	ts	0.0378787878788	61	5	0	0	0.749086566952	CHEK2	12	ENST00000382580	tcC/tcT	p.Ser415Ser/c.1245C>T	586	Pkinase	Pkinase	protein_coding	synonymous_variant		1		rs146546850	0		-1.0	0		-1.0	1	0.026		0.0252025344387	0		0	1	0.33	5.79	0.732398
45.ATU14	119	107	12	G/A	99.0	796	chr22	29091840	29091841	G	snp	ts	0.0378787878788	61	5	0	0	0.749086566952	CHEK2	12	ENST00000382580	tcC/tcT	p.Ser415Ser/c.1245C>T	586	Pkinase	Pkinase	protein_coding	synonymous_variant		1		rs146546850	0		-1.0	0		-1.0	1	0.026		0.0252025344387	0		0	1	0.33	5.79	0.732398
y188b.AUMV1	115	101	14	G/A	99.0	796	chr22	29091840	29091841	G	snp	ts	0.0378787878788	61	5	0	0	0.749086566952	CHEK2	12	ENST00000382580	tcC/tcT	p.Ser415Ser/c.1245C>T	586	Pkinase	Pkinase	protein_coding	synonymous_variant		1		rs146546850	0		-1.0	0		-1.0	1	0.026		0.0252025344387	0		0	1	0.33	5.79	0.732398
y3.AUMV1	51	39	12	G/A	99.0	796	chr22	29091840	29091841	G	snp	ts	0.0378787878788	61	5	0	0	0.749086566952	CHEK2	12	ENST00000382580	tcC/tcT	p.Ser415Ser/c.1245C>T	586	Pkinase	Pkinase	protein_coding	synonymous_variant		1		rs146546850	0		-1.0	0		-1.0	1	0.026		0.0252025344387	0		0	1	0.33	5.79	0.732398
1.ATR2U	202	201	1	T/T	99.0	797	chr22	29130457	29130458	T	snp	ts	0.0378787878788	61	5	0	0	0.749086566952	CHEK2	2	ENST00000382580	gaA/gaG	p.Glu84Glu/c.252A>G	586	None	protein_coding	synonymous_variant	LOW	1	rs1805129	1	0.0275581395349	0.0389820083039	1	0.0169	0.0427316	1	0.036	0.0355522186103	0.0289705043958	0	trf	0	0	0.55	7.0	0.706548	benign	Hereditary_cancer-predisposing_syndrome
17.AUMV1	315	314	1	T/T	99.0	797	chr22	29130457	29130458	T	snp	ts	0.0378787878788	61	5	0	0	0.749086566952	CHEK2	2	ENST00000382580	gaA/gaG	p.Glu84Glu/c.252A>G	586	None	protein_coding	synonymous_variant	LOW	1	rs1805129	1	0.0275581395349	0.0389820083039	1	0.0169	0.0427316	1	0.036	0.0355522186103	0.0289705043958	0	trf	0	0	0.55	7.0	0.706548	benign	Hereditary_cancer-predisposing_syndrome
2.ATR2U	428	428	0	T/T	99.0	797	chr22	29130457	29130458	T	snp	ts	0.0378787878788	61	5	0	0	0.749086566952	CHEK2	2	ENST00000382580	gaA/gaG	p.Glu84Glu/c.252A>G	586	None	protein_coding	synonymous_variant	LOW	1	rs1805129	1	0.0275581395349	0.0389820083039	1	0.0169	0.0427316	1	0.036	0.0355522186103	0.0289705043958	0	trf	0	0	0.55	7.0	0.706548	benign	Hereditary_cancer-predisposing_syndrome
22.AUMV1	334	334	0	T/T	99.0	797	chr22	29130457	29130458	T	snp	ts	0.0378787878788	61	5	0	0	0.749086566952	CHEK2	2	ENST00000382580	gaA/gaG	p.Glu84Glu/c.252A>G	586	None	protein_coding	synonymous_variant	LOW	1	rs1805129	1	0.0275581395349	0.0389820083039	1	0.0169	0.0427316	1	0.036	0.0355522186103	0.0289705043958	0	trf	0	0	0.55	7.0	0.706548	benign	Hereditary_cancer-predisposing_syndrome
26.ATU14	213	213	0	T/T	99.0	797	chr22	29130457	29130458	T	snp	ts	0.0378787878788	61	5	0	0	0.749086566952	CHEK2	2	ENST00000382580	gaA/gaG	p.Glu84Glu/c.252A>G	586	None	protein_coding	synonymous_variant	LOW	1	rs1805129	1	0.0275581395349	0.0389820083039	1	0.0169	0.0427316	1	0.036	0.0355522186103	0.0289705043958	0	trf	0	0	0.55	7.0	0.706548	benign	Hereditary_cancer-predisposing_syndrome
31.ATU14	380	379	1	T/T	99.0	797	chr22	29130457	29130458	T	snp	ts	0.0378787878788	61	5	0	0	0.749086566952	CHEK2	2	ENST00000382580	gaA/gaG	p.Glu84Glu/c.252A>G	586	None	protein_coding	synonymous_variant	LOW	1	rs1805129	1	0.0275581395349	0.0389820083039	1	0.0169	0.0427316	1	0.036	0.0355522186103	0.0289705043958	0	trf	0	0	0.55	7.0	0.706548	benign	Hereditary_cancer-predisposing_syndrome
35.ATU14	66	66	0	T/T	99.0	797	chr22	29130457	29130458	T	snp	ts	0.0378787878788	61	5	0	0	0.749086566952	CHEK2	2	ENST00000382580	gaA/gaG	p.Glu84Glu/c.252A>G	586	None	protein_coding	synonymous_variant	LOW	1	rs1805129	1	0.0275581395349	0.0389820083039	1	0.0169	0.0427316	1	0.036	0.0355522186103	0.0289705043958	0	trf	0	0	0.55	7.0	0.706548	benign	Hereditary_cancer-predisposing_syndrome
37.ATU14	113	113	0	T/T	99.0	797	chr22	29130457	29130458	T	snp	ts	0.0378787878788	61	5	0	0	0.749086566952	CHEK2	2	ENST00000382580	gaA/gaG	p.Glu84Glu/c.252A>G	586	None	protein_coding	synonymous_variant	LOW	1	rs1805129	1	0.0275581395349	0.0389820083039	1	0.0169	0.0427316	1	0.036	0.0355522186103	0.0289705043958	0	trf	0	0	0.55	7.0	0.706548	benign	Hereditary_cancer-predisposing_syndrome
45.ATU14	165	165	0	T/T	99.0	797	chr22	29130457	29130458	T	snp	ts	0.0378787878788	61	5	0	0	0.749086566952	CHEK2	2	ENST00000382580	gaA/gaG	p.Glu84Glu/c.252A>G	586	None	protein_coding	synonymous_variant	LOW	1	rs1805129	1	0.0275581395349	0.0389820083039	1	0.0169	0.0427316	1	0.036	0.0355522186103	0.0289705043958	0	trf	0	0	0.55	7.0	0.706548	benign	Hereditary_cancer-predisposing_syndrome
63n.AUMV1	186	186	0	T/T	99.0	797	chr22	29130457	29130458	T	snp	ts	0.0378787878788	61	5	0	0	0.749086566952	CHEK2	2	ENST00000382580	gaA/gaG	p.Glu84Glu/c.252A>G	586	None	protein_coding	synonymous_variant	LOW	1	rs1805129	1	0.0275581395349	0.0389820083039	1	0.0169	0.0427316	1	0.036	0.0355522186103	0.0289705043958	0	trf	0	0	0.55	7.0	0.706548	benign	Hereditary_cancer-predisposing_syndrome
7.A8P8B	281	280	1	T/T	99.0	797	chr22	29130457	29130458	T	snp	ts	0.0378787878788	61	5	0	0	0.749086566952	CHEK2	2	ENST00000382580	gaA/gaG	p.Glu84Glu/c.252A>G	586	None	protein_coding	synonymous_variant	LOW	1	rs1805129	1	0.0275581395349	0.0389820083039	1	0.0169	0.0427316	1	0.036	0.0355522186103	0.0289705043958	0	trf	0	0	0.55	7.0	0.706548	benign	Hereditary_cancer-predisposing_syndrome
72.ATR2U	459	457	2	T/T	99.0	797	chr22	29130457	29130458	T	snp	ts	0.0378787878788	61	5	0	0	0.749086566952	CHEK2	2	ENST00000382580	gaA/gaG	p.Glu84Glu/c.252A>G	586	None	protein_coding	synonymous_variant	LOW	1	rs1805129	1	0.0275581395349	0.0389820083039	1	0.0169	0.0427316	1	0.036	0.0355522186103	0.0289705043958	0	trf	0	0	0.55	7.0	0.706548	benign	Hereditary_cancer-predisposing_syndrome
82.ATR2U	321	321	0	T/T	99.0	797	chr22	29130457	29130458	T	snp	ts	0.0378787878788	61	5	0	0	0.749086566952	CHEK2	2	ENST00000382580	gaA/gaG	p.Glu84Glu/c.252A>G	586	None	protein_coding	synonymous_variant	LOW	1	rs1805129	1	0.0275581395349	0.0389820083039	1	0.0169	0.0427316	1	0.036	0.0355522186103	0.0289705043958	0	trf	0	0	0.55	7.0	0.706548	benign	Hereditary_cancer-predisposing_syndrome
84.ATR2U	413	411	2	T/T	99.0	797	chr22	29130457	29130458	T	snp	ts	0.0378787878788	61	5	0	0	0.749086566952	CHEK2	2	ENST00000382580	gaA/gaG	p.Glu84Glu/c.252A>G	586	None	protein_coding	synonymous_variant	LOW	1	rs1805129	1	0.0275581395349	0.0389820083039	1	0.0169	0.0427316	1	0.036	0.0355522186103	0.0289705043958	0	trf	0	0	0.55	7.0	0.706548	benign	Hereditary_cancer-predisposing_syndrome
91n.AUMV1	127	127	0	T/T	99.0	797	chr22	29130457	29130458	T	snp	ts	0.0378787878788	61	5	0	0	0.749086566952	CHEK2	2	ENST00000382580	gaA/gaG	p.Glu84Glu/c.252A>G	586	None	protein_coding	synonymous_variant	LOW	1	rs1805129	1	0.0275581395349	0.0389820083039	1	0.0169	0.0427316	1	0.036	0.0355522186103	0.0289705043958	0	trf	0	0	0.55	7.0	0.706548	benign	Hereditary_cancer-predisposing_syndrome
BS2.ATU14	53	51	2	T/T	99.0	797	chr22	29130457	29130458	T	snp	ts	0.0378787878788	61	5	0	0	0.749086566952	CHEK2	2	ENST00000382580	gaA/gaG	p.Glu84Glu/c.252A>G	586	None	protein_coding	synonymous_variant	LOW	1	rs1805129	1	0.0275581395349	0.0389820083039	1	0.0169	0.0427316	1	0.036	0.0355522186103	0.0289705043958	0	trf	0	0	0.55	7.0	0.706548	benign	Hereditary_cancer-predisposing_syndrome
PS1.A8P8B	196	196	0	T/T	99.0	797	chr22	29130457	29130458	T	snp	ts	0.0378787878788	61	5	0	0	0.749086566952	CHEK2	2	ENST00000382580	gaA/gaG	p.Glu84Glu/c.252A>G	586	None	protein_coding	synonymous_variant	LOW	1	rs1805129	1	0.0275581395349	0.0389820083039	1	0.0169	0.0427316	1	0.036	0.0355522186103	0.0289705043958	0	trf	0	0	0.55	7.0	0.706548	benign	Hereditary_cancer-predisposing_syndrome
PS2.A8P8B	176	176	0	T/T	99.0	797	chr22	29130457	29130458	T	snp	ts	0.0378787878788	61	5	0	0	0.749086566952	CHEK2	2	ENST00000382580	gaA/gaG	p.Glu84Glu/c.252A>G	586	None	protein_coding	synonymous_variant	LOW	1	rs1805129	1	0.0275581395349	0.0389820083039	1	0.0169	0.0427316	1	0.036	0.0355522186103	0.0289705043958	0	trf	0	0	0.55	7.0	0.706548	benign	Hereditary_cancer-predisposing_syndrome
SA23.ATU14	133	133	0	T/T	99.0	797	chr22	29130457	29130458	T	snp	ts	0.0378787878788	61	5	0	0	0.749086566952	CHEK2	2	ENST00000382580	gaA/gaG	p.Glu84Glu/c.252A>G	586	None	protein_coding	synonymous_variant	LOW	1	rs1805129	1	0.0275581395349	0.0389820083039	1	0.0169	0.0427316	1	0.036	0.0355522186103	0.0289705043958	0	trf	0	0	0.55	7.0	0.706548	benign	Hereditary_cancer-predisposing_syndrome
SA36.A8P8B	92	92	0	T/T	99.0	797	chr22	29130457	29130458	T	snp	ts	0.0378787878788	61	5	0	0	0.749086566952	CHEK2	2	ENST00000382580	gaA/gaG	p.Glu84Glu/c.252A>G	586	None	protein_coding	synonymous_variant	LOW	1	rs1805129	1	0.0275581395349	0.0389820083039	1	0.0169	0.0427316	1	0.036	0.0355522186103	0.0289705043958	0	trf	0	0	0.55	7.0	0.706548	benign	Hereditary_cancer-predisposing_syndrome
SA38.ATU14	33	33	0	T/T	90.0	797	chr22	29130457	29130458	T	snp	ts	0.0378787878788	61	5	0	0	0.749086566952	CHEK2	2	ENST00000382580	gaA/gaG	p.Glu84Glu/c.252A>G	586	None	protein_coding	synonymous_variant	LOW	1	rs1805129	1	0.0275581395349	0.0389820083039	1	0.0169	0.0427316	1	0.036	0.0355522186103	0.0289705043958	0	trf	0	0	0.55	7.0	0.706548	benign	Hereditary_cancer-predisposing_syndrome
SA41.ATU14	244	243	1	T/T	99.0	797	chr22	29130457	29130458	T	snp	ts	0.0378787878788	61	5	0	0	0.749086566952	CHEK2	2	ENST00000382580	gaA/gaG	p.Glu84Glu/c.252A>G	586	None	protein_coding	synonymous_variant	LOW	1	rs1805129	1	0.0275581395349	0.0389820083039	1	0.0169	0.0427316	1	0.036	0.0355522186103	0.0289705043958	0	trf	0	0	0.55	7.0	0.706548	benign	Hereditary_cancer-predisposing_syndrome
Y102.ATU14	59	59	0	T/T	99.0	797	chr22	29130457	29130458	T	snp	ts	0.0378787878788	61	5	0	0	0.749086566952	CHEK2	2	ENST00000382580	gaA/gaG	p.Glu84Glu/c.252A>G	586	None	protein_coding	synonymous_variant	LOW	1	rs1805129	1	0.0275581395349	0.0389820083039	1	0.0169	0.0427316	1	0.036	0.0355522186103	0.0289705043958	0	trf	0	0	0.55	7.0	0.706548	benign	Hereditary_cancer-predisposing_syndrome
Y105.ATU14	62	62	0	T/T	99.0	797	chr22	29130457	29130458	T	snp	ts	0.0378787878788	61	5	0	0	0.749086566952	CHEK2	2	ENST00000382580	gaA/gaG	p.Glu84Glu/c.252A>G	586	None	protein_coding	synonymous_variant	LOW	1	rs1805129	1	0.0275581395349	0.0389820083039	1	0.0169	0.0427316	1	0.036	0.0355522186103	0.0289705043958	0	trf	0	0	0.55	7.0	0.706548	benign	Hereditary_cancer-predisposing_syndrome
Y115B.ATU14	210	210	0	T/T	99.0	797	chr22	29130457	29130458	T	snp	ts	0.0378787878788	61	5	0	0	0.749086566952	CHEK2	2	ENST00000382580	gaA/gaG	p.Glu84Glu/c.252A>G	586	None	protein_coding	synonymous_variant	LOW	1	rs1805129	1	0.0275581395349	0.0389820083039	1	0.0169	0.0427316	1	0.036	0.0355522186103	0.0289705043958	0	trf	0	0	0.55	7.0	0.706548	benign	Hereditary_cancer-predisposing_syndrome
Y123B.ATU14	311	311	0	T/T	99.0	797	chr22	29130457	29130458	T	snp	ts	0.0378787878788	61	5	0	0	0.749086566952	CHEK2	2	ENST00000382580	gaA/gaG	p.Glu84Glu/c.252A>G	586	None	protein_coding	synonymous_variant	LOW	1	rs1805129	1	0.0275581395349	0.0389820083039	1	0.0169	0.0427316	1	0.036	0.0355522186103	0.0289705043958	0	trf	0	0	0.55	7.0	0.706548	benign	Hereditary_cancer-predisposing_syndrome
Y135.ATU14	489	487	2	T/T	99.0	797	chr22	29130457	29130458	T	snp	ts	0.0378787878788	61	5	0	0	0.749086566952	CHEK2	2	ENST00000382580	gaA/gaG	p.Glu84Glu/c.252A>G	586	None	protein_coding	synonymous_variant	LOW	1	rs1805129	1	0.0275581395349	0.0389820083039	1	0.0169	0.0427316	1	0.036	0.0355522186103	0.0289705043958	0	trf	0	0	0.55	7.0	0.706548	benign	Hereditary_cancer-predisposing_syndrome
Y137B.ATU14	117	117	0	T/T	99.0	797	chr22	29130457	29130458	T	snp	ts	0.0378787878788	61	5	0	0	0.749086566952	CHEK2	2	ENST00000382580	gaA/gaG	p.Glu84Glu/c.252A>G	586	None	protein_coding	synonymous_variant	LOW	1	rs1805129	1	0.0275581395349	0.0389820083039	1	0.0169	0.0427316	1	0.036	0.0355522186103	0.0289705043958	0	trf	0	0	0.55	7.0	0.706548	benign	Hereditary_cancer-predisposing_syndrome
Y143C.ATU14	110	110	0	T/T	99.0	797	chr22	29130457	29130458	T	snp	ts	0.0378787878788	61	5	0	0	0.749086566952	CHEK2	2	ENST00000382580	gaA/gaG	p.Glu84Glu/c.252A>G	586	None	protein_coding	synonymous_variant	LOW	1	rs1805129	1	0.0275581395349	0.0389820083039	1	0.0169	0.0427316	1	0.036	0.0355522186103	0.0289705043958	0	trf	0	0	0.55	7.0	0.706548	benign	Hereditary_cancer-predisposing_syndrome
Y145B.ATU14	863	857	6	T/T	99.0	797	chr22	29130457	29130458	T	snp	ts	0.0378787878788	61	5	0	0	0.749086566952	CHEK2	2	ENST00000382580	gaA/gaG	p.Glu84Glu/c.252A>G	586	None	protein_coding	synonymous_variant	LOW	1	rs1805129	1	0.0275581395349	0.0389820083039	1	0.0169	0.0427316	1	0.036	0.0355522186103	0.0289705043958	0	trf	0	0	0.55	7.0	0.706548	benign	Hereditary_cancer-predisposing_syndrome
Y146B.A8P8B	71	70	1	T/T	99.0	797	chr22	29130457	29130458	T	snp	ts	0.0378787878788	61	5	0	0	0.749086566952	CHEK2	2	ENST00000382580	gaA/gaG	p.Glu84Glu/c.252A>G	586	None	protein_coding	synonymous_variant	LOW	1	rs1805129	1	0.0275581395349	0.0389820083039	1	0.0169	0.0427316	1	0.036	0.0355522186103	0.0289705043958	0	trf	0	0	0.55	7.0	0.706548	benign	Hereditary_cancer-predisposing_syndrome
Y151B.ATU14	101	99	2	T/T	99.0	797	chr22	29130457	29130458	T	snp	ts	0.0378787878788	61	5	0	0	0.749086566952	CHEK2	2	ENST00000382580	gaA/gaG	p.Glu84Glu/c.252A>G	586	None	protein_coding	synonymous_variant	LOW	1	rs1805129	1	0.0275581395349	0.0389820083039	1	0.0169	0.0427316	1	0.036	0.0355522186103	0.0289705043958	0	trf	0	0	0.55	7.0	0.706548	benign	Hereditary_cancer-predisposing_syndrome
Y159C.ATU14	111	111	0	T/T	99.0	797	chr22	29130457	29130458	T	snp	ts	0.0378787878788	61	5	0	0	0.749086566952	CHEK2	2	ENST00000382580	gaA/gaG	p.Glu84Glu/c.252A>G	586	None	protein_coding	synonymous_variant	LOW	1	rs1805129	1	0.0275581395349	0.0389820083039	1	0.0169	0.0427316	1	0.036	0.0355522186103	0.0289705043958	0	trf	0	0	0.55	7.0	0.706548	benign	Hereditary_cancer-predisposing_syndrome
Y161C.ATU14	34	34	0	T/T	93.0	797	chr22	29130457	29130458	T	snp	ts	0.0378787878788	61	5	0	0	0.749086566952	CHEK2	2	ENST00000382580	gaA/gaG	p.Glu84Glu/c.252A>G	586	None	protein_coding	synonymous_variant	LOW	1	rs1805129	1	0.0275581395349	0.0389820083039	1	0.0169	0.0427316	1	0.036	0.0355522186103	0.0289705043958	0	trf	0	0	0.55	7.0	0.706548	benign	Hereditary_cancer-predisposing_syndrome
Y165B.ATU14	214	214	0	T/T	99.0	797	chr22	29130457	29130458	T	snp	ts	0.0378787878788	61	5	0	0	0.749086566952	CHEK2	2	ENST00000382580	gaA/gaG	p.Glu84Glu/c.252A>G	586	None	protein_coding	synonymous_variant	LOW	1	rs1805129	1	0.0275581395349	0.0389820083039	1	0.0169	0.0427316	1	0.036	0.0355522186103	0.0289705043958	0	trf	0	0	0.55	7.0	0.706548	benign	Hereditary_cancer-predisposing_syndrome
Y167B.A8P8B	120	119	1	T/T	99.0	797	chr22	29130457	29130458	T	snp	ts	0.0378787878788	61	5	0	0	0.749086566952	CHEK2	2	ENST00000382580	gaA/gaG	p.Glu84Glu/c.252A>G	586	None	protein_coding	synonymous_variant	LOW	1	rs1805129	1	0.0275581395349	0.0389820083039	1	0.0169	0.0427316	1	0.036	0.0355522186103	0.0289705043958	0	trf	0	0	0.55	7.0	0.706548	benign	Hereditary_cancer-predisposing_syndrome
Y168C.A8P8B	36	35	1	T/T	89.0	797	chr22	29130457	29130458	T	snp	ts	0.0378787878788	61	5	0	0	0.749086566952	CHEK2	2	ENST00000382580	gaA/gaG	p.Glu84Glu/c.252A>G	586	None	protein_coding	synonymous_variant	LOW	1	rs1805129	1	0.0275581395349	0.0389820083039	1	0.0169	0.0427316	1	0.036	0.0355522186103	0.0289705043958	0	trf	0	0	0.55	7.0	0.706548	benign	Hereditary_cancer-predisposing_syndrome
Y169C.ATU14	113	113	0	T/T	99.0	797	chr22	29130457	29130458	T	snp	ts	0.0378787878788	61	5	0	0	0.749086566952	CHEK2	2	ENST00000382580	gaA/gaG	p.Glu84Glu/c.252A>G	586	None	protein_coding	synonymous_variant	LOW	1	rs1805129	1	0.0275581395349	0.0389820083039	1	0.0169	0.0427316	1	0.036	0.0355522186103	0.0289705043958	0	trf	0	0	0.55	7.0	0.706548	benign	Hereditary_cancer-predisposing_syndrome
ps4.AL9E5	277	274	3	T/T	99.0	797	chr22	29130457	29130458	T	snp	ts	0.0378787878788	61	5	0	0	0.749086566952	CHEK2	2	ENST00000382580	gaA/gaG	p.Glu84Glu/c.252A>G	586	None	protein_coding	synonymous_variant	LOW	1	rs1805129	1	0.0275581395349	0.0389820083039	1	0.0169	0.0427316	1	0.036	0.0355522186103	0.0289705043958	0	trf	0	0	0.55	7.0	0.706548	benign	Hereditary_cancer-predisposing_syndrome
ps6.AUMV1	91	91	0	T/T	99.0	797	chr22	29130457	29130458	T	snp	ts	0.0378787878788	61	5	0	0	0.749086566952	CHEK2	2	ENST00000382580	gaA/gaG	p.Glu84Glu/c.252A>G	586	None	protein_coding	synonymous_variant	LOW	1	rs1805129	1	0.0275581395349	0.0389820083039	1	0.0169	0.0427316	1	0.036	0.0355522186103	0.0289705043958	0	trf	0	0	0.55	7.0	0.706548	benign	Hereditary_cancer-predisposing_syndrome
sa14.AL9E5	359	355	4	T/T	99.0	797	chr22	29130457	29130458	T	snp	ts	0.0378787878788	61	5	0	0	0.749086566952	CHEK2	2	ENST00000382580	gaA/gaG	p.Glu84Glu/c.252A>G	586	None	protein_coding	synonymous_variant	LOW	1	rs1805129	1	0.0275581395349	0.0389820083039	1	0.0169	0.0427316	1	0.036	0.0355522186103	0.0289705043958	0	trf	0	0	0.55	7.0	0.706548	benign	Hereditary_cancer-predisposing_syndrome
sa39.AL9E5	50	50	0	T/T	99.0	797	chr22	29130457	29130458	T	snp	ts	0.0378787878788	61	5	0	0	0.749086566952	CHEK2	2	ENST00000382580	gaA/gaG	p.Glu84Glu/c.252A>G	586	None	protein_coding	synonymous_variant	LOW	1	rs1805129	1	0.0275581395349	0.0389820083039	1	0.0169	0.0427316	1	0.036	0.0355522186103	0.0289705043958	0	trf	0	0	0.55	7.0	0.706548	benign	Hereditary_cancer-predisposing_syndrome
sa40.ATR2U	168	167	1	T/T	99.0	797	chr22	29130457	29130458	T	snp	ts	0.0378787878788	61	5	0	0	0.749086566952	CHEK2	2	ENST00000382580	gaA/gaG	p.Glu84Glu/c.252A>G	586	None	protein_coding	synonymous_variant	LOW	1	rs1805129	1	0.0275581395349	0.0389820083039	1	0.0169	0.0427316	1	0.036	0.0355522186103	0.0289705043958	0	trf	0	0	0.55	7.0	0.706548	benign	Hereditary_cancer-predisposing_syndrome
y103.AUMV1	501	497	4	T/T	99.0	797	chr22	29130457	29130458	T	snp	ts	0.0378787878788	61	5	0	0	0.749086566952	CHEK2	2	ENST00000382580	gaA/gaG	p.Glu84Glu/c.252A>G	586	None	protein_coding	synonymous_variant	LOW	1	rs1805129	1	0.0275581395349	0.0389820083039	1	0.0169	0.0427316	1	0.036	0.0355522186103	0.0289705043958	0	trf	0	0	0.55	7.0	0.706548	benign	Hereditary_cancer-predisposing_syndrome
y104.ATR2U	67	67	0	T/T	99.0	797	chr22	29130457	29130458	T	snp	ts	0.0378787878788	61	5	0	0	0.749086566952	CHEK2	2	ENST00000382580	gaA/gaG	p.Glu84Glu/c.252A>G	586	None	protein_coding	synonymous_variant	LOW	1	rs1805129	1	0.0275581395349	0.0389820083039	1	0.0169	0.0427316	1	0.036	0.0355522186103	0.0289705043958	0	trf	0	0	0.55	7.0	0.706548	benign	Hereditary_cancer-predisposing_syndrome
y109b.AUMV1	54	54	0	T/T	99.0	797	chr22	29130457	29130458	T	snp	ts	0.0378787878788	61	5	0	0	0.749086566952	CHEK2	2	ENST00000382580	gaA/gaG	p.Glu84Glu/c.252A>G	586	None	protein_coding	synonymous_variant	LOW	1	rs1805129	1	0.0275581395349	0.0389820083039	1	0.0169	0.0427316	1	0.036	0.0355522186103	0.0289705043958	0	trf	0	0	0.55	7.0	0.706548	benign	Hereditary_cancer-predisposing_syndrome
y110b.AUMV1	50	50	0	T/T	99.0	797	chr22	29130457	29130458	T	snp	ts	0.0378787878788	61	5	0	0	0.749086566952	CHEK2	2	ENST00000382580	gaA/gaG	p.Glu84Glu/c.252A>G	586	None	protein_coding	synonymous_variant	LOW	1	rs1805129	1	0.0275581395349	0.0389820083039	1	0.0169	0.0427316	1	0.036	0.0355522186103	0.0289705043958	0	trf	0	0	0.55	7.0	0.706548	benign	Hereditary_cancer-predisposing_syndrome
y128b.AUMV1	305	304	1	T/T	99.0	797	chr22	29130457	29130458	T	snp	ts	0.0378787878788	61	5	0	0	0.749086566952	CHEK2	2	ENST00000382580	gaA/gaG	p.Glu84Glu/c.252A>G	586	None	protein_coding	synonymous_variant	LOW	1	rs1805129	1	0.0275581395349	0.0389820083039	1	0.0169	0.0427316	1	0.036	0.0355522186103	0.0289705043958	0	trf	0	0	0.55	7.0	0.706548	benign	Hereditary_cancer-predisposing_syndrome
y132b.AUMV1	85	85	0	T/T	99.0	797	chr22	29130457	29130458	T	snp	ts	0.0378787878788	61	5	0	0	0.749086566952	CHEK2	2	ENST00000382580	gaA/gaG	p.Glu84Glu/c.252A>G	586	None	protein_coding	synonymous_variant	LOW	1	rs1805129	1	0.0275581395349	0.0389820083039	1	0.0169	0.0427316	1	0.036	0.0355522186103	0.0289705043958	0	trf	0	0	0.55	7.0	0.706548	benign	Hereditary_cancer-predisposing_syndrome
y147c.AUMV1	451	447	4	T/T	99.0	797	chr22	29130457	29130458	T	snp	ts	0.0378787878788	61	5	0	0	0.749086566952	CHEK2	2	ENST00000382580	gaA/gaG	p.Glu84Glu/c.252A>G	586	None	protein_coding	synonymous_variant	LOW	1	rs1805129	1	0.0275581395349	0.0389820083039	1	0.0169	0.0427316	1	0.036	0.0355522186103	0.0289705043958	0	trf	0	0	0.55	7.0	0.706548	benign	Hereditary_cancer-predisposing_syndrome
y162c.ATR2U	85	85	0	T/T	99.0	797	chr22	29130457	29130458	T	snp	ts	0.0378787878788	61	5	0	0	0.749086566952	CHEK2	2	ENST00000382580	gaA/gaG	p.Glu84Glu/c.252A>G	586	None	protein_coding	synonymous_variant	LOW	1	rs1805129	1	0.0275581395349	0.0389820083039	1	0.0169	0.0427316	1	0.036	0.0355522186103	0.0289705043958	0	trf	0	0	0.55	7.0	0.706548	benign	Hereditary_cancer-predisposing_syndrome
y179f.AL9E5	440	439	1	T/T	99.0	797	chr22	29130457	29130458	T	snp	ts	0.0378787878788	61	5	0	0	0.749086566952	CHEK2	2	ENST00000382580	gaA/gaG	p.Glu84Glu/c.252A>G	586	None	protein_coding	synonymous_variant	LOW	1	rs1805129	1	0.0275581395349	0.0389820083039	1	0.0169	0.0427316	1	0.036	0.0355522186103	0.0289705043958	0	trf	0	0	0.55	7.0	0.706548	benign	Hereditary_cancer-predisposing_syndrome
y183b.AUMV1	220	220	0	T/T	99.0	797	chr22	29130457	29130458	T	snp	ts	0.0378787878788	61	5	0	0	0.749086566952	CHEK2	2	ENST00000382580	gaA/gaG	p.Glu84Glu/c.252A>G	586	None	protein_coding	synonymous_variant	LOW	1	rs1805129	1	0.0275581395349	0.0389820083039	1	0.0169	0.0427316	1	0.036	0.0355522186103	0.0289705043958	0	trf	0	0	0.55	7.0	0.706548	benign	Hereditary_cancer-predisposing_syndrome
y188b.AUMV1	120	118	2	T/T	99.0	797	chr22	29130457	29130458	T	snp	ts	0.0378787878788	61	5	0	0	0.749086566952	CHEK2	2	ENST00000382580	gaA/gaG	p.Glu84Glu/c.252A>G	586	None	protein_coding	synonymous_variant	LOW	1	rs1805129	1	0.0275581395349	0.0389820083039	1	0.0169	0.0427316	1	0.036	0.0355522186103	0.0289705043958	0	trf	0	0	0.55	7.0	0.706548	benign	Hereditary_cancer-predisposing_syndrome
y199b.AL9E5	419	417	2	T/T	99.0	797	chr22	29130457	29130458	T	snp	ts	0.0378787878788	61	5	0	0	0.749086566952	CHEK2	2	ENST00000382580	gaA/gaG	p.Glu84Glu/c.252A>G	586	None	protein_coding	synonymous_variant	LOW	1	rs1805129	1	0.0275581395349	0.0389820083039	1	0.0169	0.0427316	1	0.036	0.0355522186103	0.0289705043958	0	trf	0	0	0.55	7.0	0.706548	benign	Hereditary_cancer-predisposing_syndrome
y3.AUMV1	73	71	2	T/T	99.0	797	chr22	29130457	29130458	T	snp	ts	0.0378787878788	61	5	0	0	0.749086566952	CHEK2	2	ENST00000382580	gaA/gaG	p.Glu84Glu/c.252A>G	586	None	protein_coding	synonymous_variant	LOW	1	rs1805129	1	0.0275581395349	0.0389820083039	1	0.0169	0.0427316	1	0.036	0.0355522186103	0.0289705043958	0	trf	0	0	0.55	7.0	0.706548	benign	Hereditary_cancer-predisposing_syndrome
y68.ATR2U	209	208	1	T/T	99.0	797	chr22	29130457	29130458	T	snp	ts	0.0378787878788	61	5	0	0	0.749086566952	CHEK2	2	ENST00000382580	gaA/gaG	p.Glu84Glu/c.252A>G	586	None	protein_coding	synonymous_variant	LOW	1	rs1805129	1	0.0275581395349	0.0389820083039	1	0.0169	0.0427316	1	0.036	0.0355522186103	0.0289705043958	0	trf	0	0	0.55	7.0	0.706548	benign	Hereditary_cancer-predisposing_syndrome
y77.AL9E5	260	260	0	T/T	99.0	797	chr22	29130457	29130458	T	snp	ts	0.0378787878788	61	5	0	0	0.749086566952	CHEK2	2	ENST00000382580	gaA/gaG	p.Glu84Glu/c.252A>G	586	None	protein_coding	synonymous_variant	LOW	1	rs1805129	1	0.0275581395349	0.0389820083039	1	0.0169	0.0427316	1	0.036	0.0355522186103	0.0289705043958	0	trf	0	0	0.55	7.0	0.706548	benign	Hereditary_cancer-predisposing_syndrome
y88.AUMV1	41	41	0	T/T	99.0	797	chr22	29130457	29130458	T	snp	ts	0.0378787878788	61	5	0	0	0.749086566952	CHEK2	2	ENST00000382580	gaA/gaG	p.Glu84Glu/c.252A>G	586	None	protein_coding	synonymous_variant	LOW	1	rs1805129	1	0.0275581395349	0.0389820083039	1	0.0169	0.0427316	1	0.036	0.0355522186103	0.0289705043958	0	trf	0	0	0.55	7.0	0.706548	benign	Hereditary_cancer-predisposing_syndrome
10.ATU14	150	79	71	T/C	99.0	797	chr22	29130457	29130458	T	snp	ts	0.0378787878788	61	5	0	0	0.749086566952	CHEK2	2	ENST00000382580	gaA/gaG	p.Glu84Glu/c.252A>G	586	None	protein_coding	synonymous_variant	LOW	1	rs1805129	1	0.0275581395349	0.0389820083039	1	0.0169	0.0427316	1	0.036	0.0355522186103	0.0289705043958	0	trf	0	0	0.55	7.0	0.706548	benign	Hereditary_cancer-predisposing_syndrome
21.AL9E5	20	14	6	T/C	99.0	797	chr22	29130457	29130458	T	snp	ts	0.0378787878788	61	5	0	0	0.749086566952	CHEK2	2	ENST00000382580	gaA/gaG	p.Glu84Glu/c.252A>G	586	None	protein_coding	synonymous_variant	LOW	1	rs1805129	1	0.0275581395349	0.0389820083039	1	0.0169	0.0427316	1	0.036	0.0355522186103	0.0289705043958	0	trf	0	0	0.55	7.0	0.706548	benign	Hereditary_cancer-predisposing_syndrome
5.ATR2U	374	193	181	T/C	99.0	797	chr22	29130457	29130458	T	snp	ts	0.0378787878788	61	5	0	0	0.749086566952	CHEK2	2	ENST00000382580	gaA/gaG	p.Glu84Glu/c.252A>G	586	None	protein_coding	synonymous_variant	LOW	1	rs1805129	1	0.0275581395349	0.0389820083039	1	0.0169	0.0427316	1	0.036	0.0355522186103	0.0289705043958	0	trf	0	0	0.55	7.0	0.706548	benign	Hereditary_cancer-predisposing_syndrome
y134b.AL9E5	335	155	180	T/C	99.0	797	chr22	29130457	29130458	T	snp	ts	0.0378787878788	61	5	0	0	0.749086566952	CHEK2	2	ENST00000382580	gaA/gaG	p.Glu84Glu/c.252A>G	586	None	protein_coding	synonymous_variant	LOW	1	rs1805129	1	0.0275581395349	0.0389820083039	1	0.0169	0.0427316	1	0.036	0.0355522186103	0.0289705043958	0	trf	0	0	0.55	7.0	0.706548	benign	Hereditary_cancer-predisposing_syndrome
y144c.AUMV1	188	89	99	T/C	99.0	797	chr22	29130457	29130458	T	snp	ts	0.0378787878788	61	5	0	0	0.749086566952	CHEK2	2	ENST00000382580	gaA/gaG	p.Glu84Glu/c.252A>G	586	None	protein_coding	synonymous_variant	LOW	1	rs1805129	1	0.0275581395349	0.0389820083039	1	0.0169	0.0427316	1	0.036	0.0355522186103	0.0289705043958	0	trf	0	0	0.55	7.0	0.706548	benign	Hereditary_cancer-predisposing_syndrome
[truncated: 15 more columns]
